# Supplementary material for: Isolation and molecular structures of novel organotellurium(iv) halides, oxyhalide and mixed halide
Source: Royal Society of Chemistry journal article supplement (doi:10.1039/c2dt30645j), 2012-01-01
Supplement: c2dt30645j.pdf [file c2dt30645j.pdf]

## Supporting Information

### Isolation and molecular structures of novel organotellurium(IV) halides, oxyhalide and mixed halide

Prakul Rakesh <sup>a</sup>, Harkesh B. Singh <sup>a,\*</sup>, Ray J. Butcher <sup>b</sup>

<sup>a</sup> *Department of Chemistry, Indian Institute of Technology Bombay, Powai, Mumbai 400076, India*

<sup>b</sup> *Department of Chemistry, Howard University, Washington, DC 20059, USA*

| Contents                                                                                                                                                        | Page No.       |
|-----------------------------------------------------------------------------------------------------------------------------------------------------------------|----------------|
| 1. <sup>1</sup> H, <sup>13</sup> C, <sup>125</sup> Te NMR spectra,<br>Mass spectra, CHN analysis, FT-IR spectra of<br><b>5, 6, 7, 8, 9</b> and <b>12</b>        | <b>S2-S28</b>  |
| 2. Optimized geometries of <b>12a</b> and <b>12b</b>                                                                                                            | <b>S29</b>     |
| 3. Comparison of the experimentally obtained<br>structural parameters and optimized geometries<br>obtained structural parameters of <b>12a</b> and <b>12b</b> . | <b>S29</b>     |
| 4. <sup>1</sup> H NMR titration experiments of <b>6</b> and<br>4,4-dimethyl-2-phenyl-2-oxazoline                                                                | <b>S30-S33</b> |

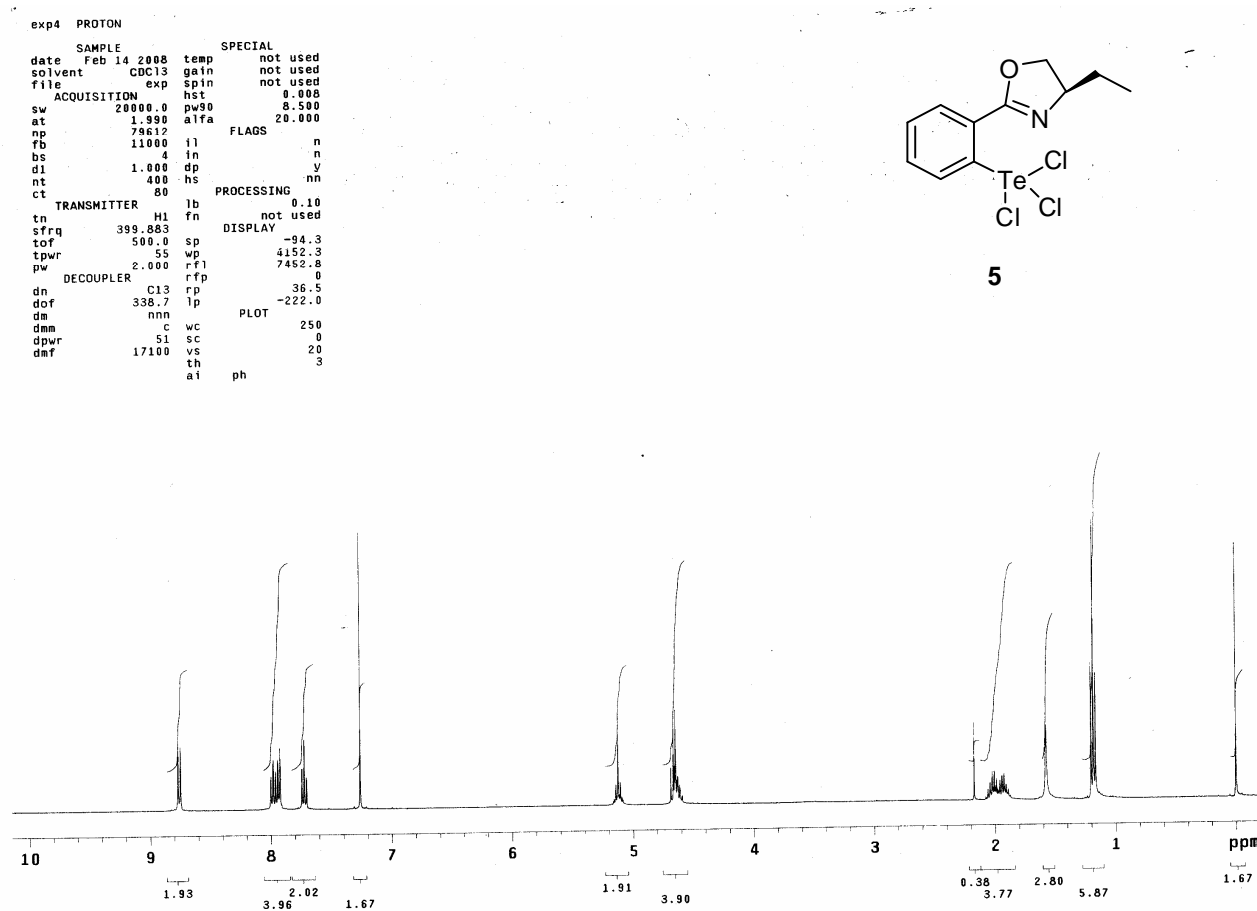

**Figure S1.**  $^1\text{H}$  NMR spectrum of compound **5**.

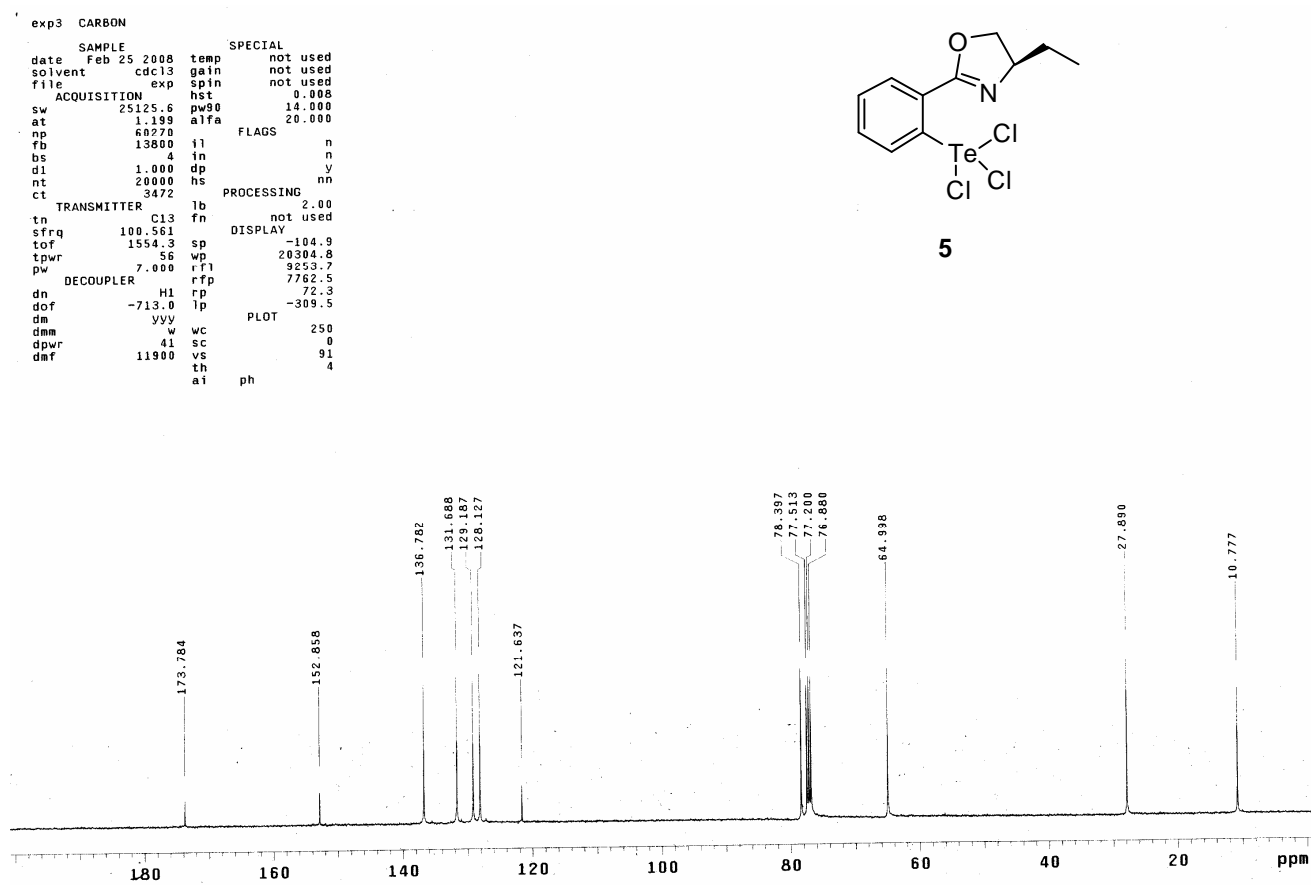

Figure S2.  $^{13}\text{C}$  NMR spectrum of compound 5.

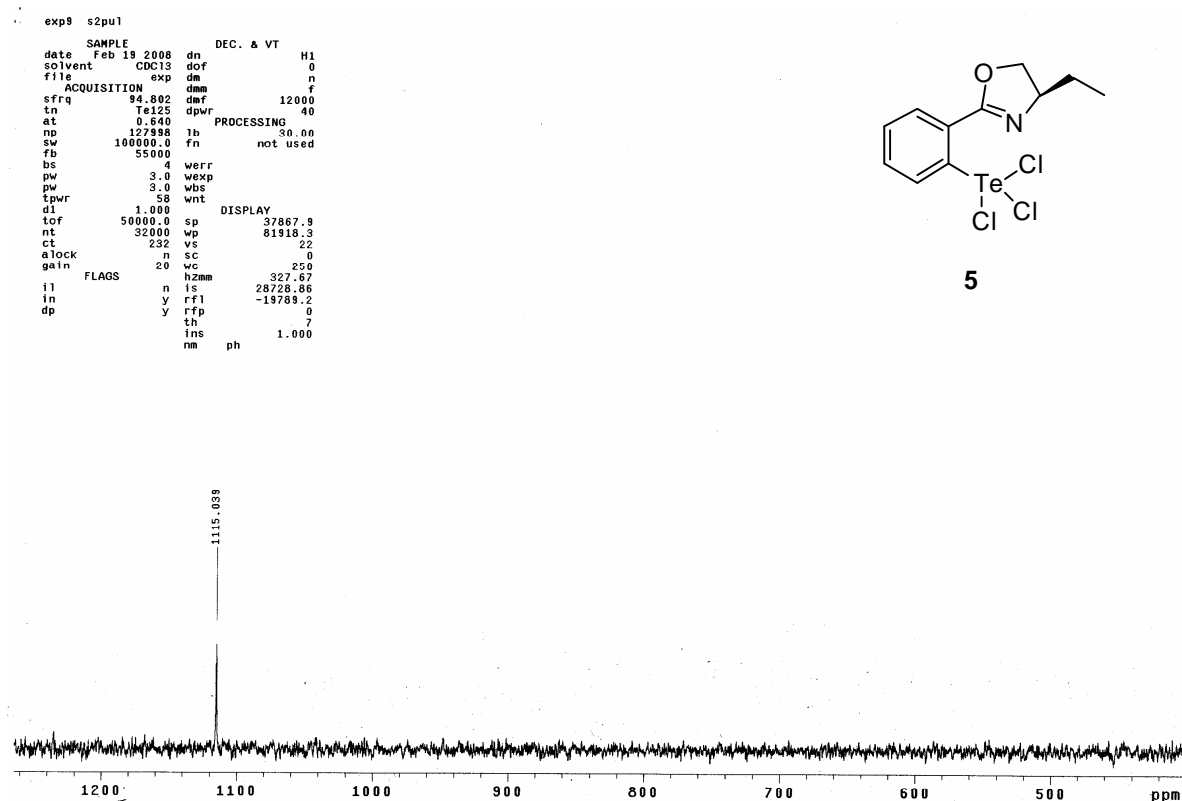

Figure S3.  $^{125}\text{Te}$  NMR spectrum of compound 5.

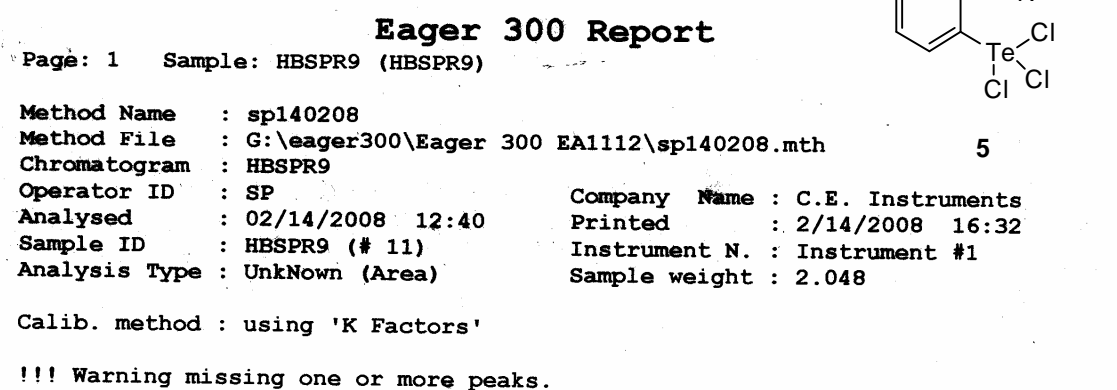

| Element Name | %       | Ret.Time | Area    | BC | Area ratio | K factor    |
|--------------|---------|----------|---------|----|------------|-------------|
| Nitrogen     | 3.8014  | 43       | 101369  | FU | 17.484530  | .130208E+07 |
| Carbon       | 32.2927 | 66       | 1772396 | FU | 1.000000   | .267497E+07 |
| Hydrogen     | 2.7310  | 169      | 405624  | RS | 4.369553   | .644501E+07 |
| Totals       | 38.8250 |          | 2279389 |    |            |             |

Figure S4. CHN analysis of compound 5.

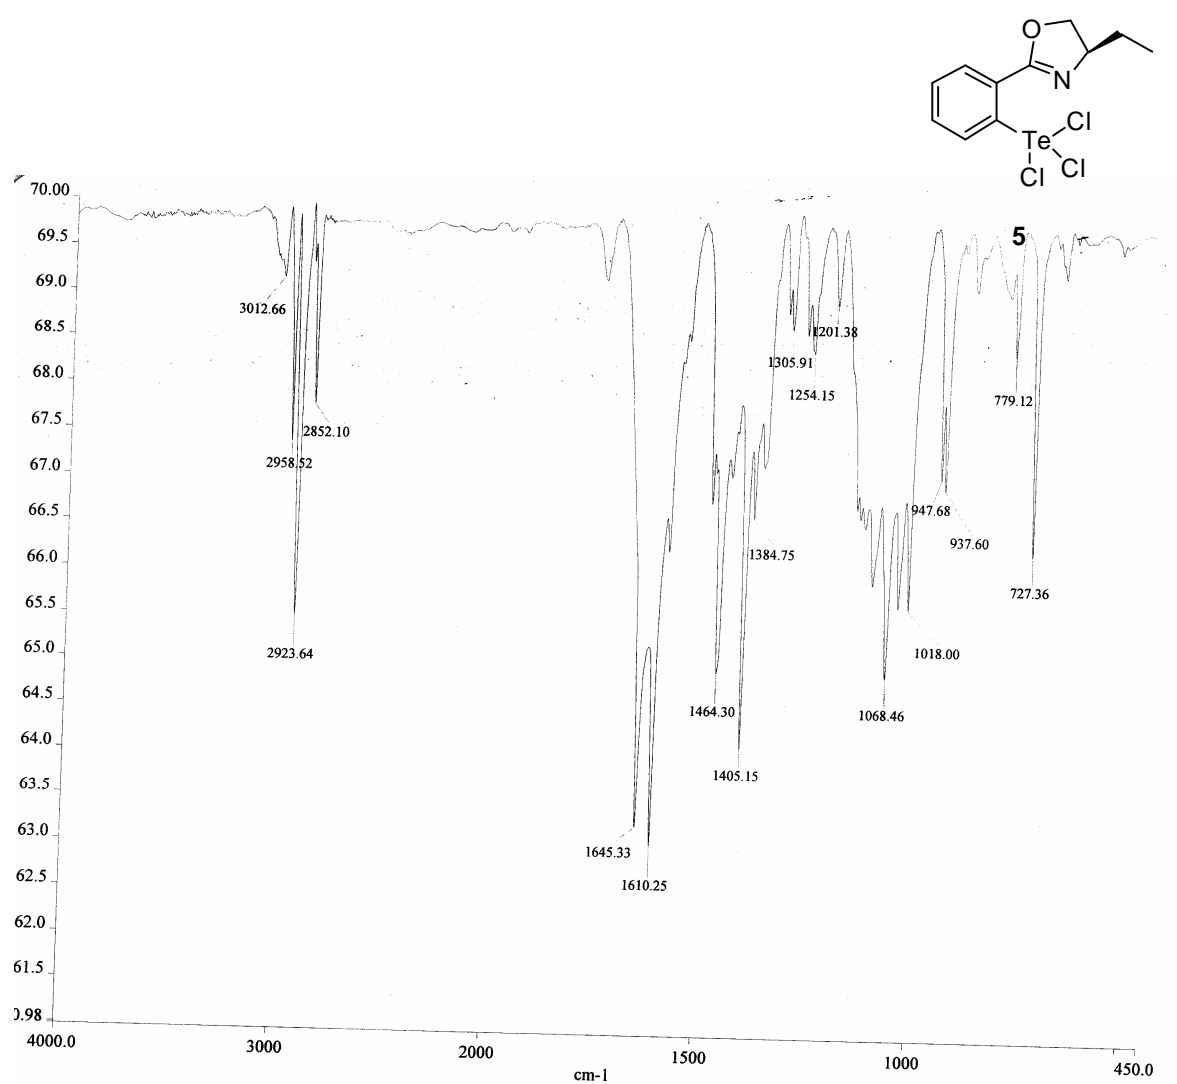

**Figure S5.** FT-IR spectrum of compound 5.

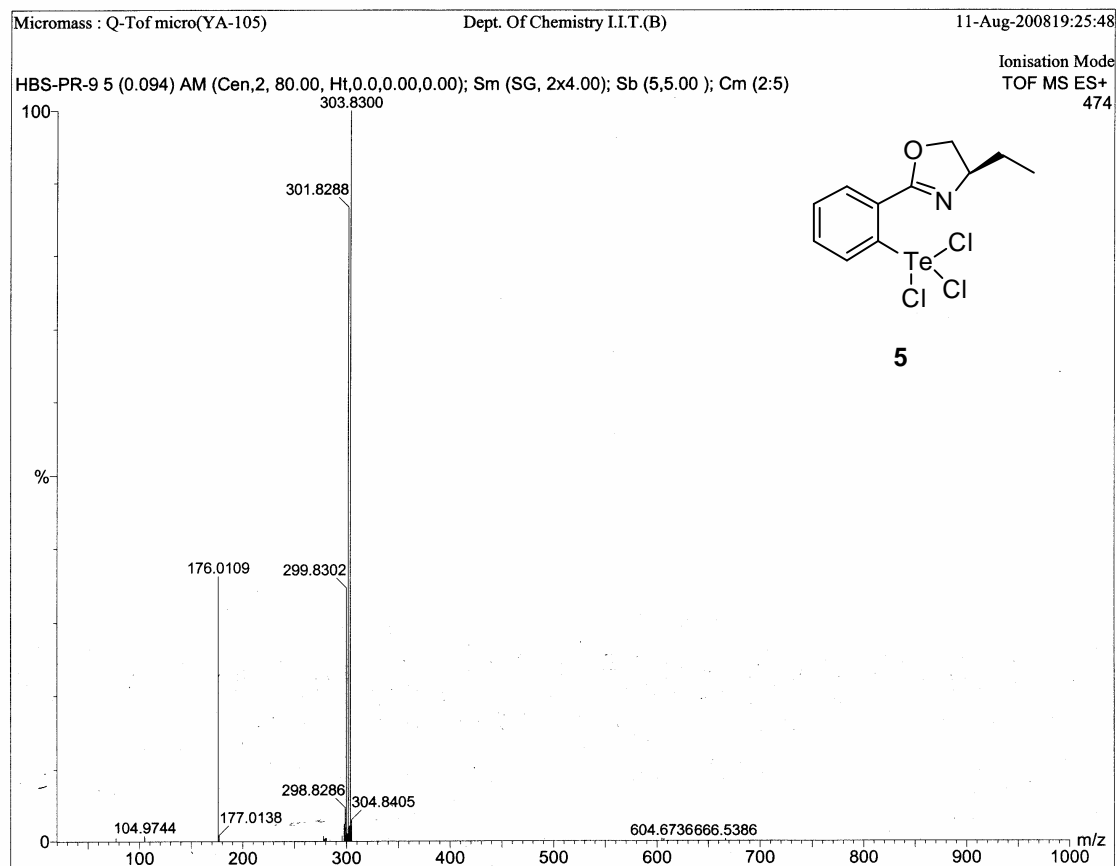

**Figure S6.** ESI Mass spectrum of compound **5**.

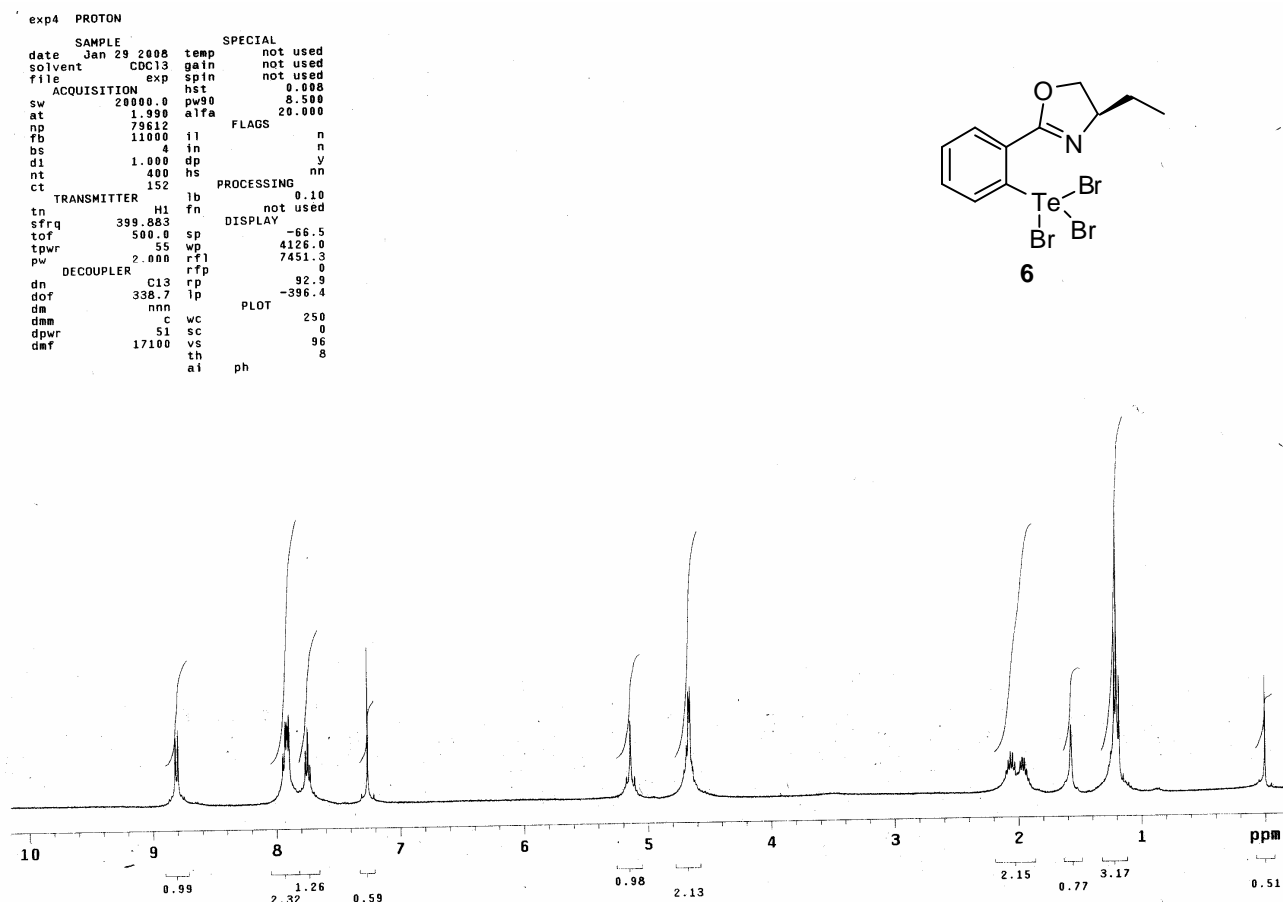

Figure S7.  $^1\text{H}$  NMR spectrum of compound 6.

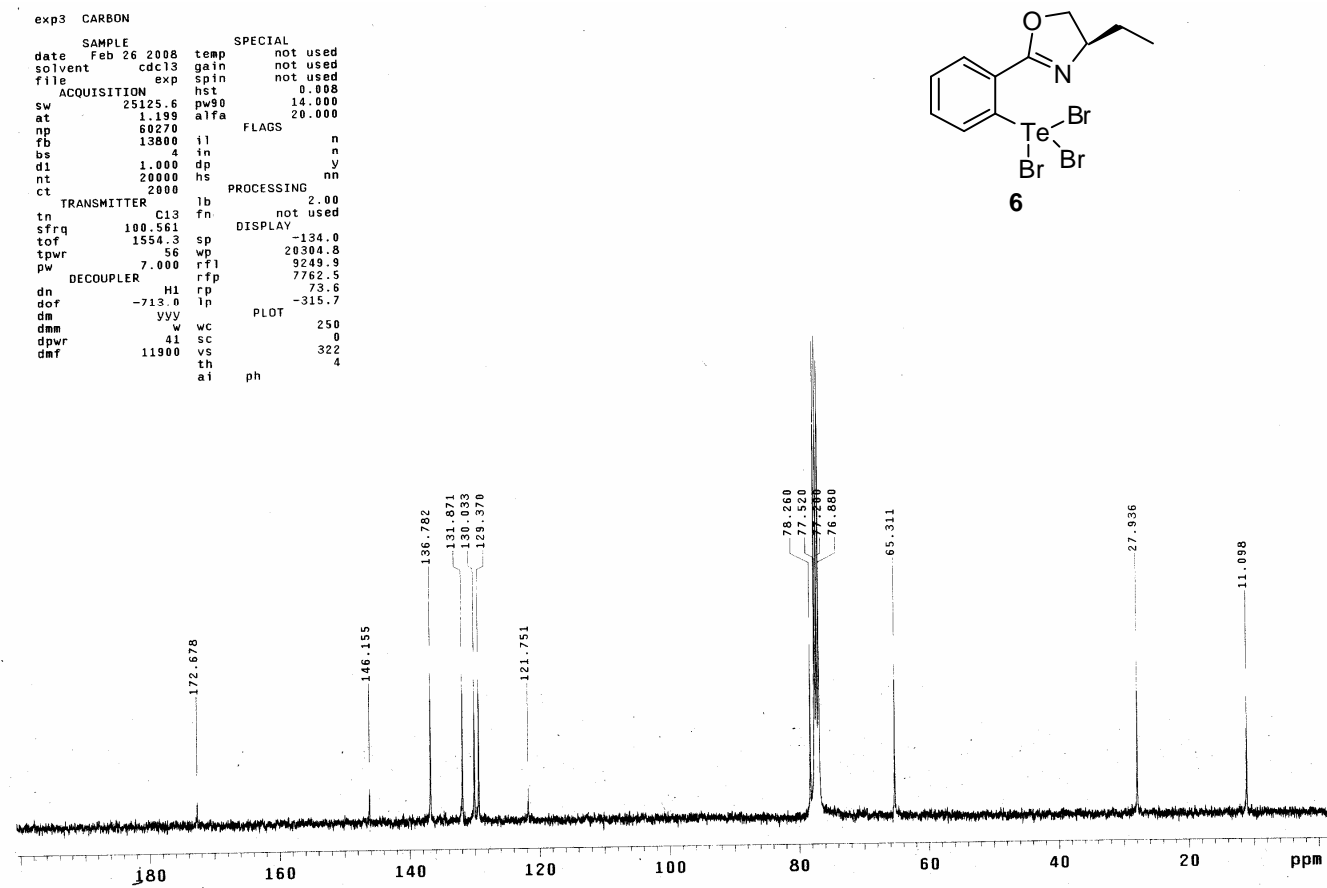

Figure S8. <sup>13</sup>C NMR spectrum of compound 6.



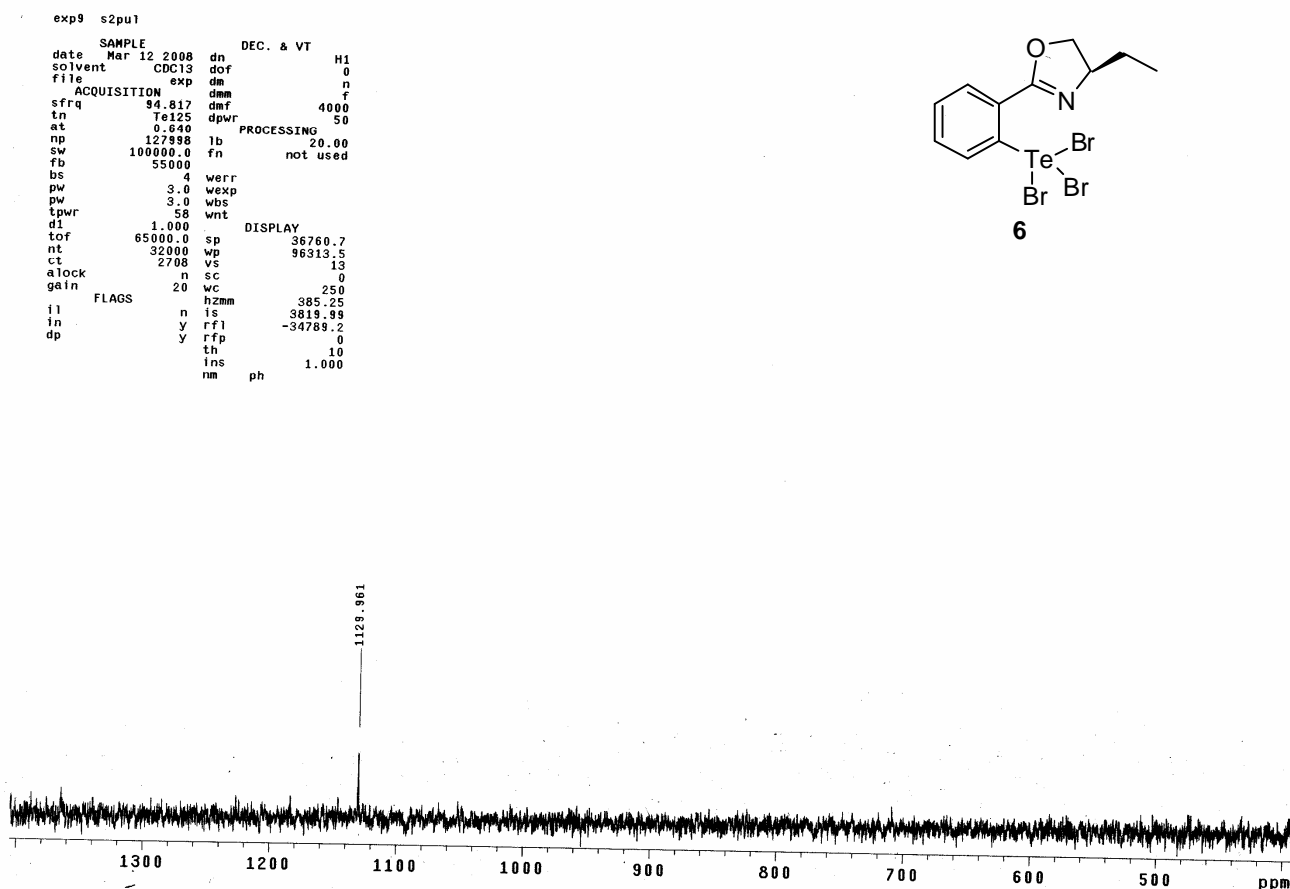

Figure S9.  $^{125}\text{Te}$  NMR spectrum of compound 6.

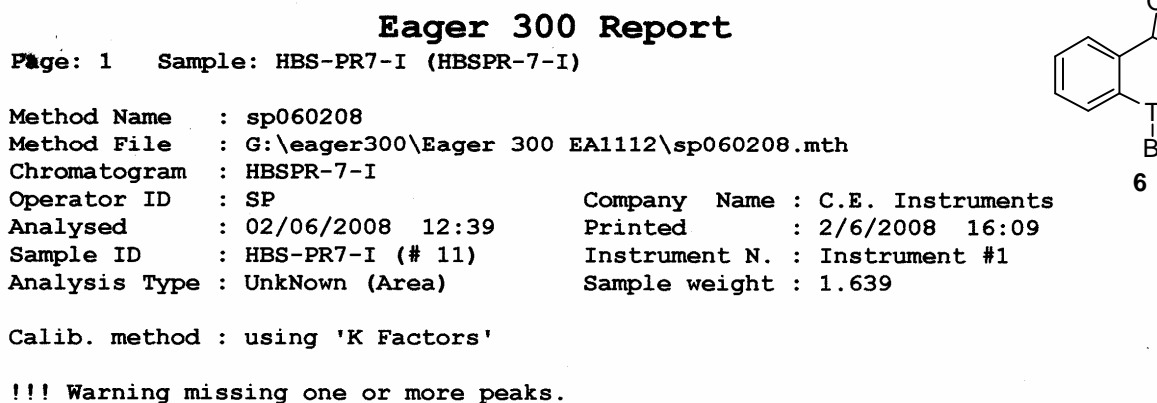

Figure S10. CHN analysis of compound 6.

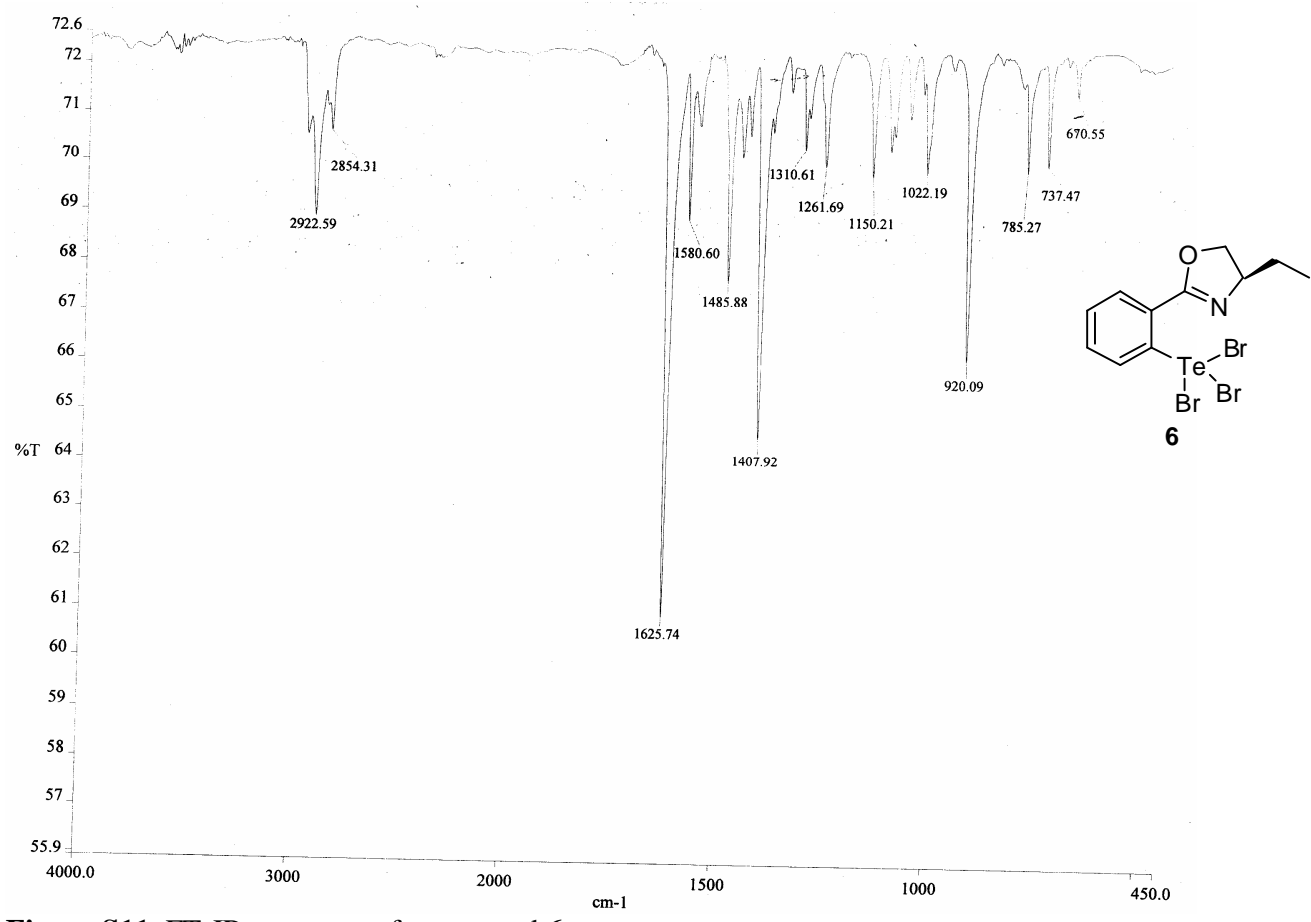

Figure S11. FT-IR spectrum of compound 6.

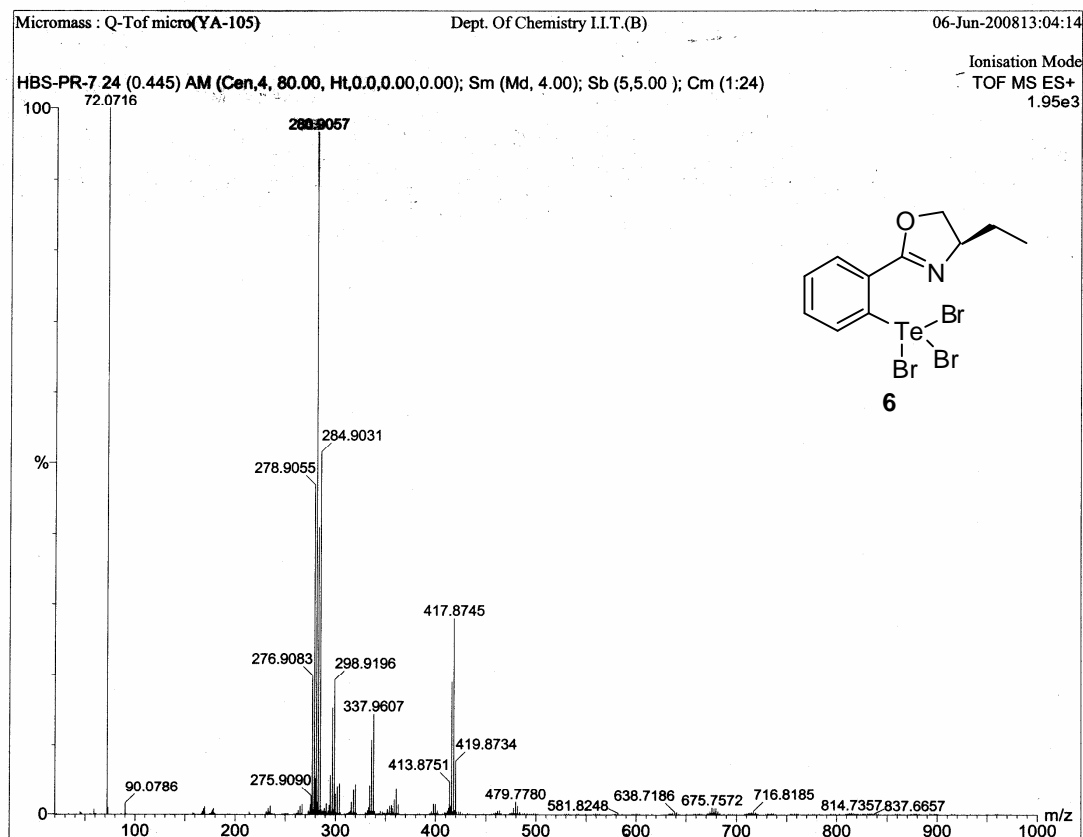

Figure S12. ESI Mass spectrum of compound 6.

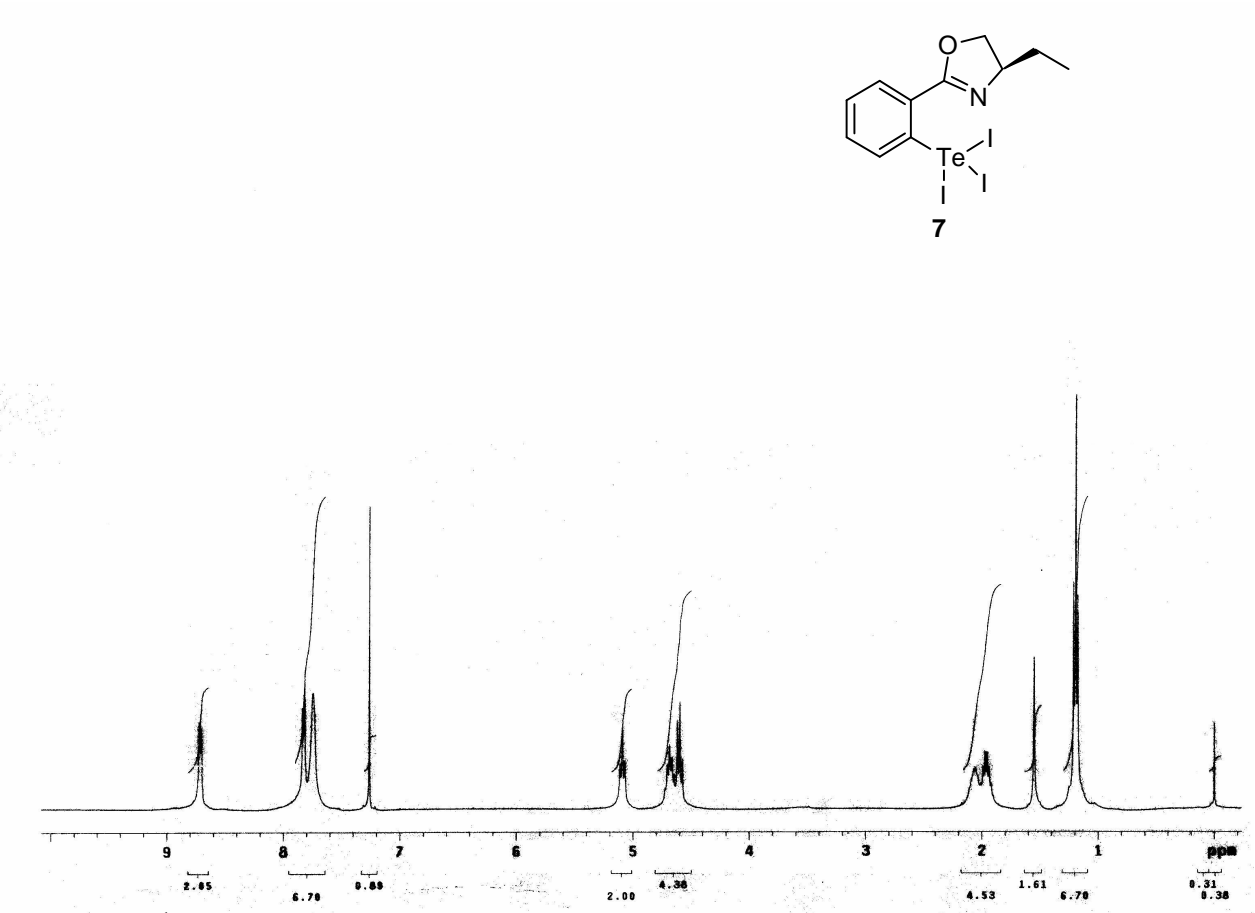

Figure S13. <sup>1</sup>H NMR spectrum of compound 7.

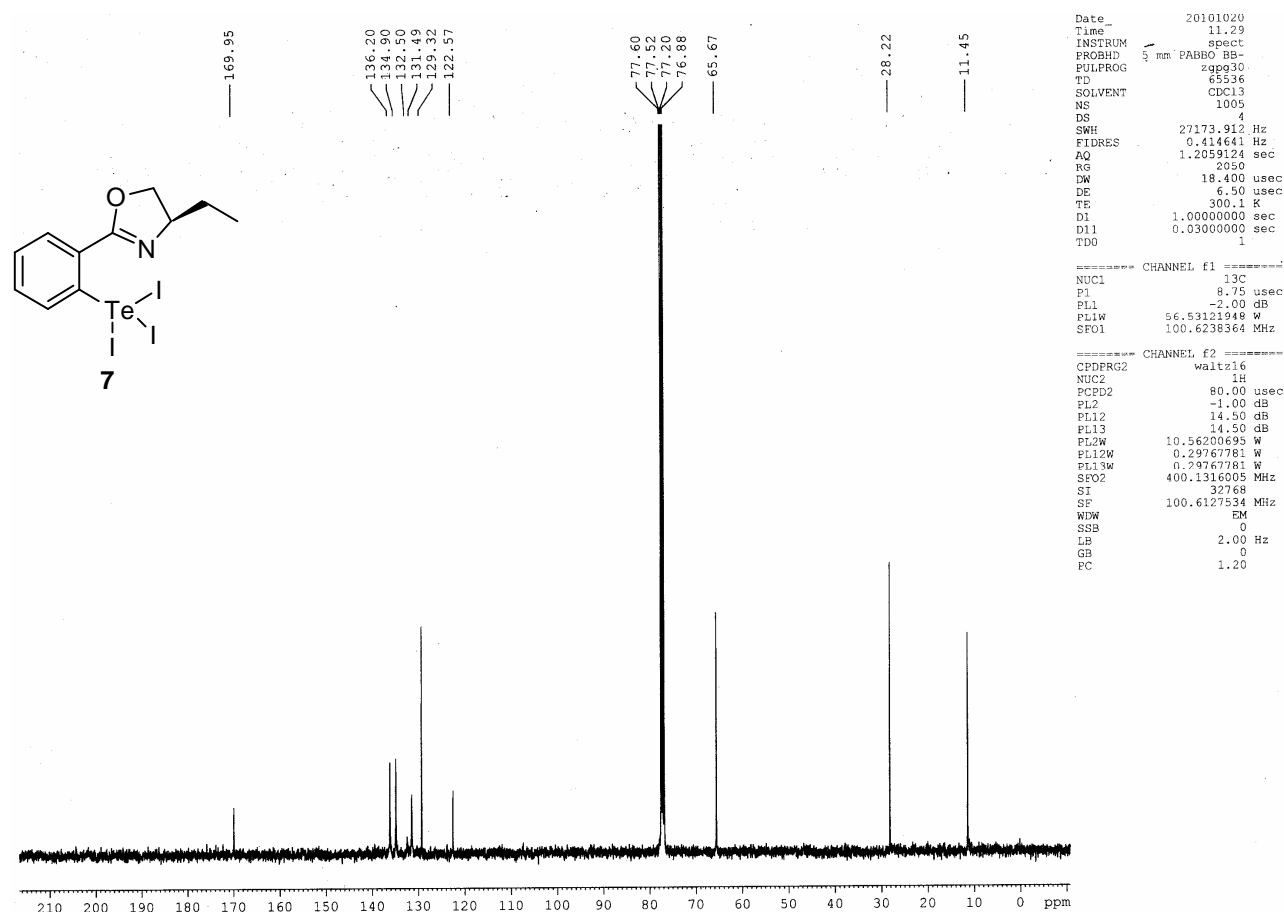

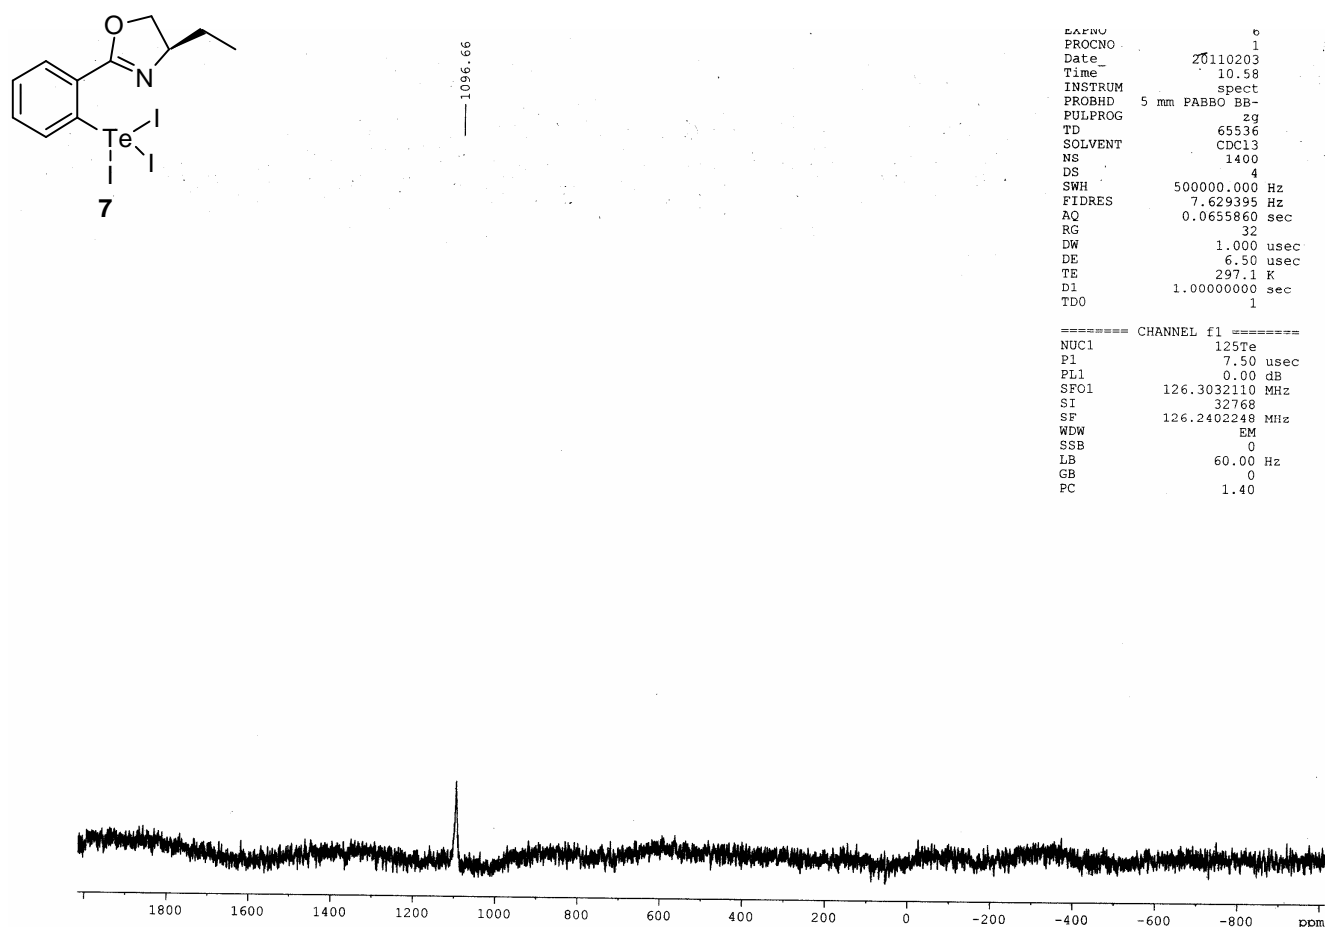

Figure S15. <sup>125</sup>Te NMR spectrum of compound 7.

### Eager 300 Report

Page: 1 Sample: PR8 (PR8)

Method Name : sp290708  
 Method File : D:\CHNS2008\SP290708.mth  
 Chromatogram : PR8  
 Operator ID : SP  
 Analysed : 07/29/2008 11:47  
 Sample ID : PR8 (# 6)  
 Analysis Type : UnkNown (Area)

Company Name : C.E. Instruments  
 Printed : 7/29/2008 15:29  
 Instrument N. : Instrument #1  
 Sample weight : 1.474

Calib. method : using 'K Factors'

!!! Warning missing one or more peaks.

| Element Name | %       | Ret.Time | Area   | BC | Area ratio | K factor    |
|--------------|---------|----------|--------|----|------------|-------------|
| Nitrogen     | 2.0339  | 205 43   | 28987  | RS | 24.846210  | 966894.1000 |
| Carbon       | 19.8849 | 1936 67  | 720217 | RS | 1.000000   | .244629E+07 |
| Hydrogen     | 1.6081  | 177 172  | 164111 | RS | 4.388597   | .631820E+07 |
| Totals       | 23.5269 |          | 913315 |    |            |             |

Figure S16. CHN analysis of compound 7.

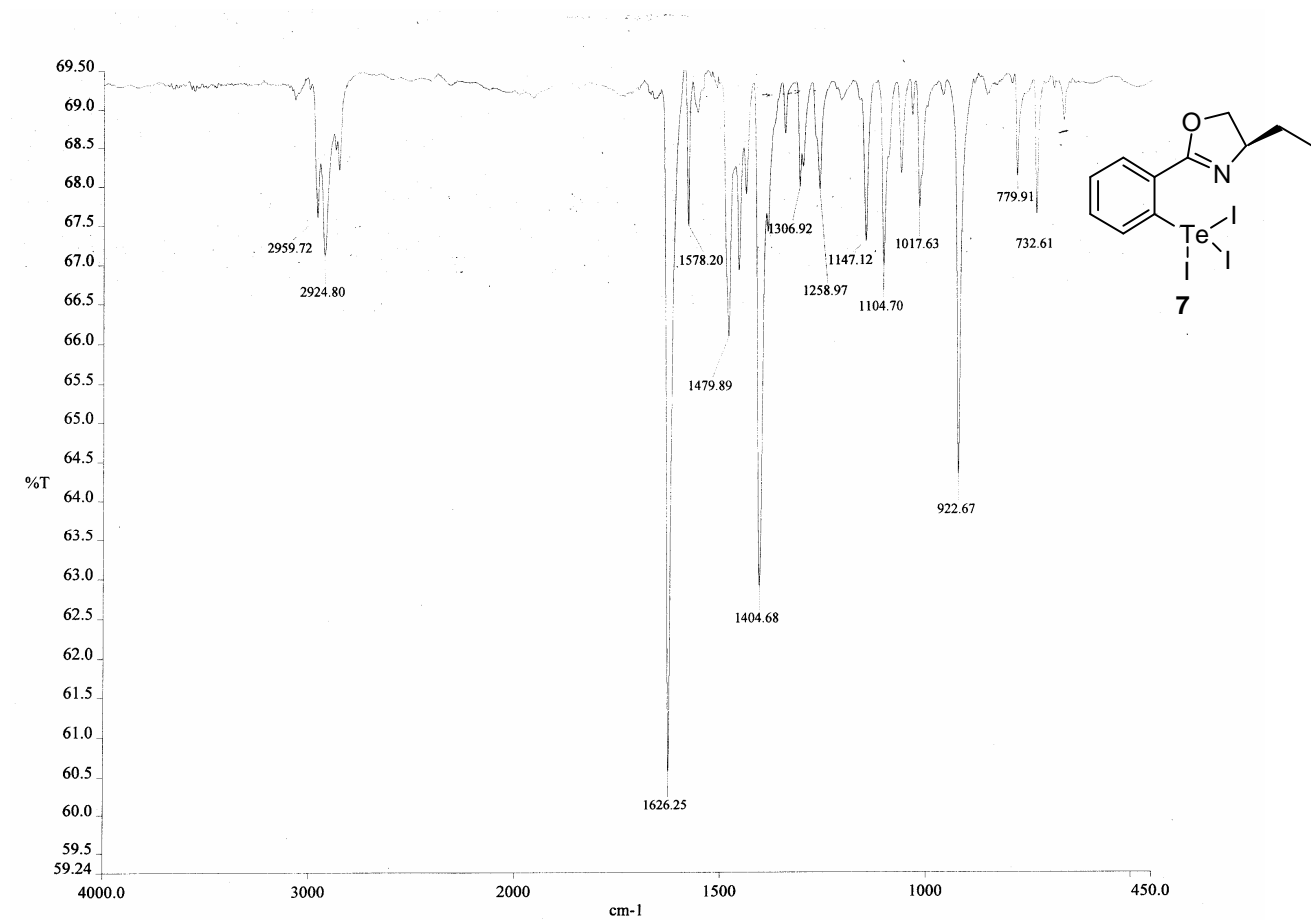

Figure S17. FT-IR spectrum of compound 7.

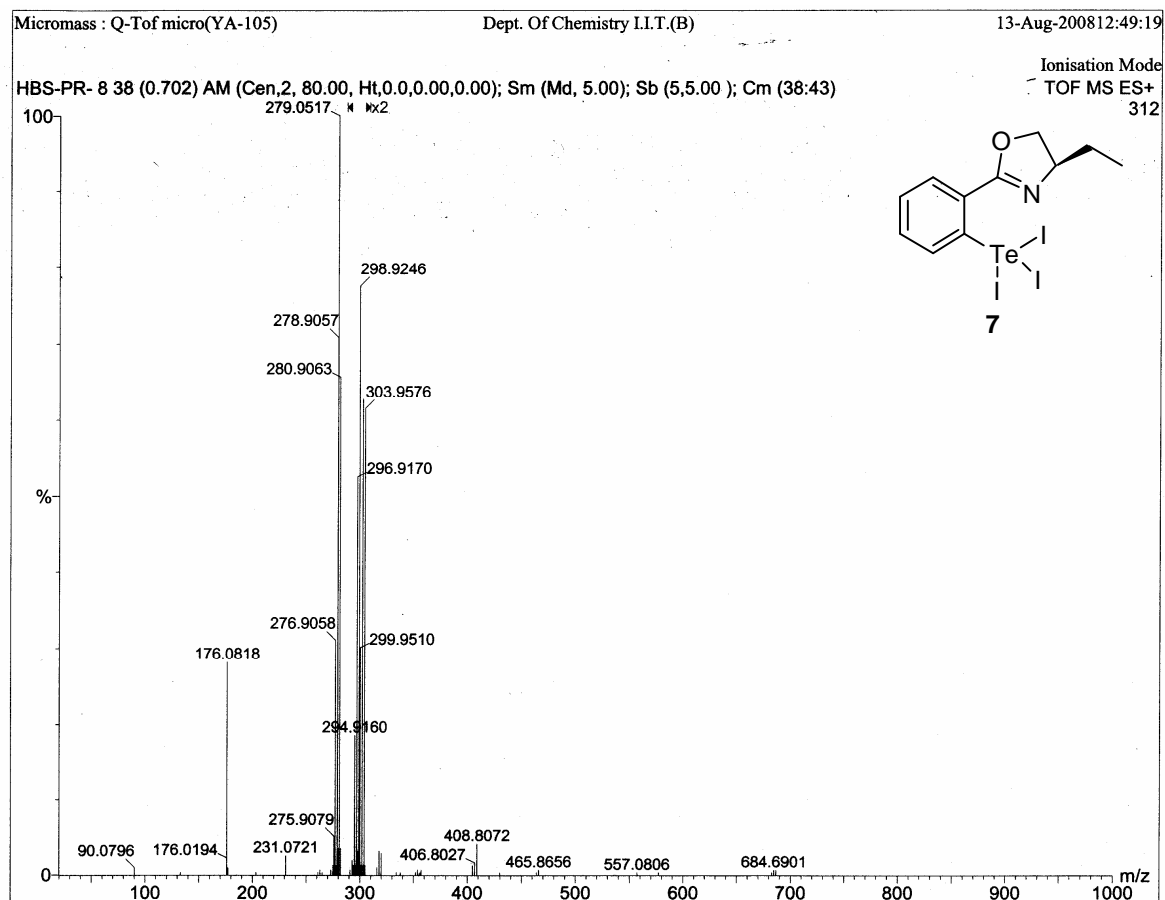

**Figure S18.** ESI Mass spectrum of compound **7**.



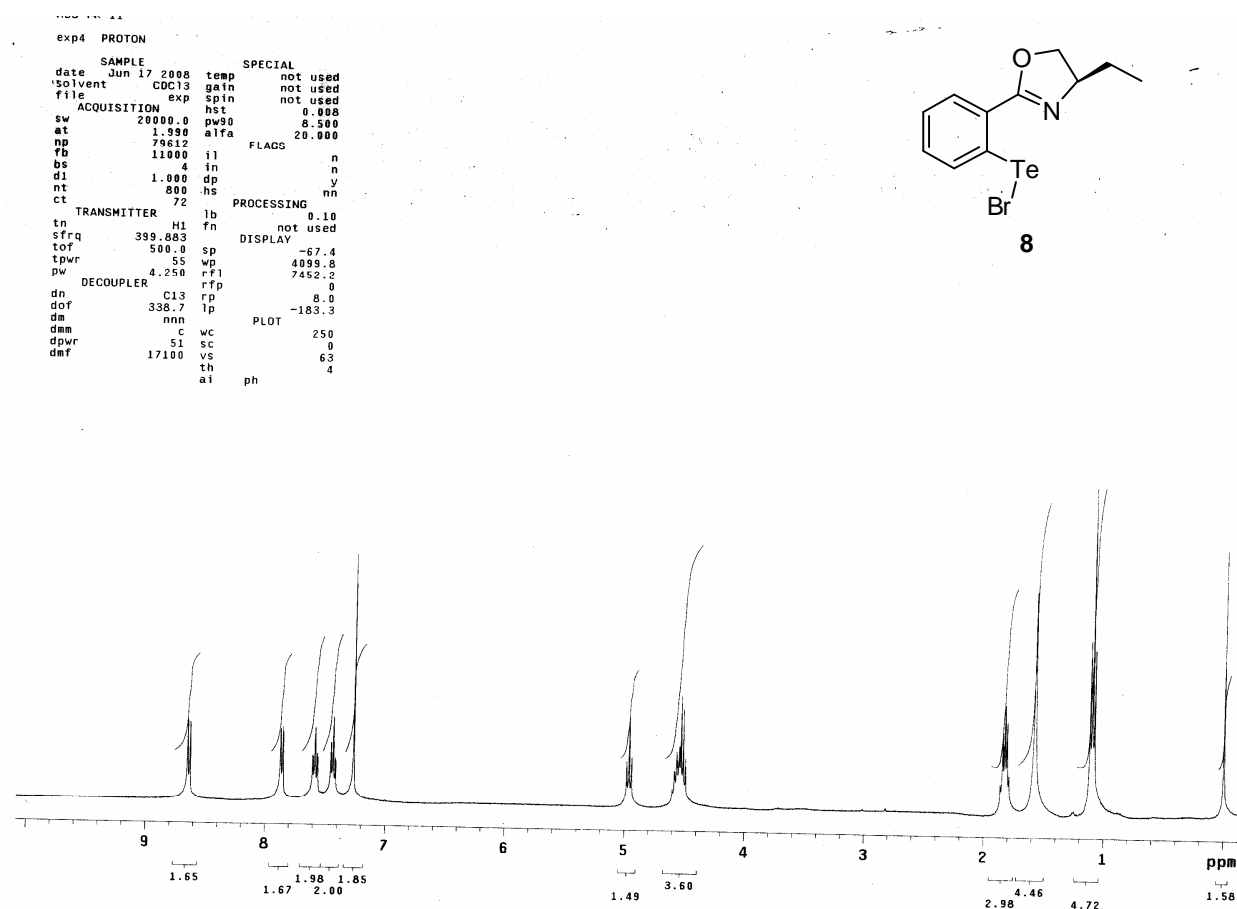

Figure S19.  $^1\text{H}$  NMR spectrum of compound 8.

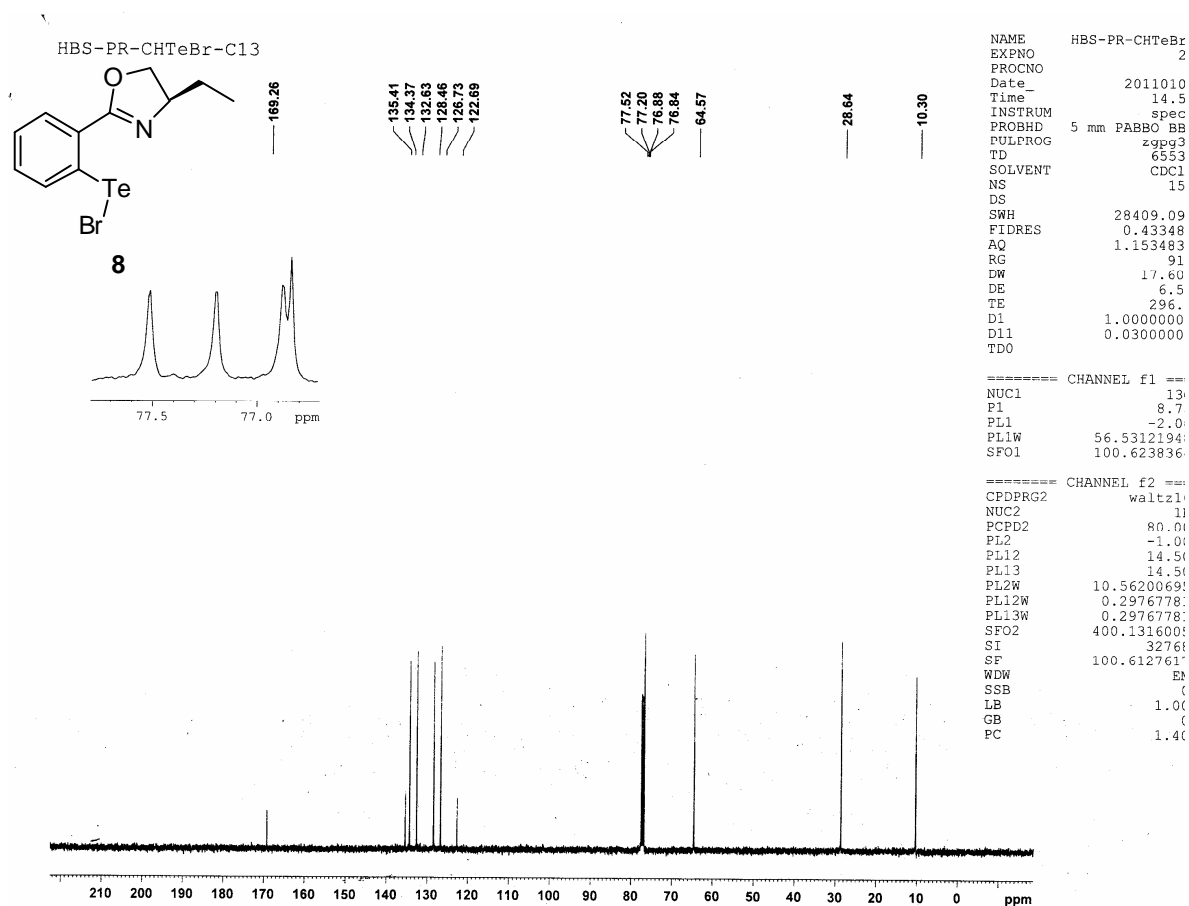

Figure S20.  $^{13}\text{C}$  NMR spectrum of compound **8**.

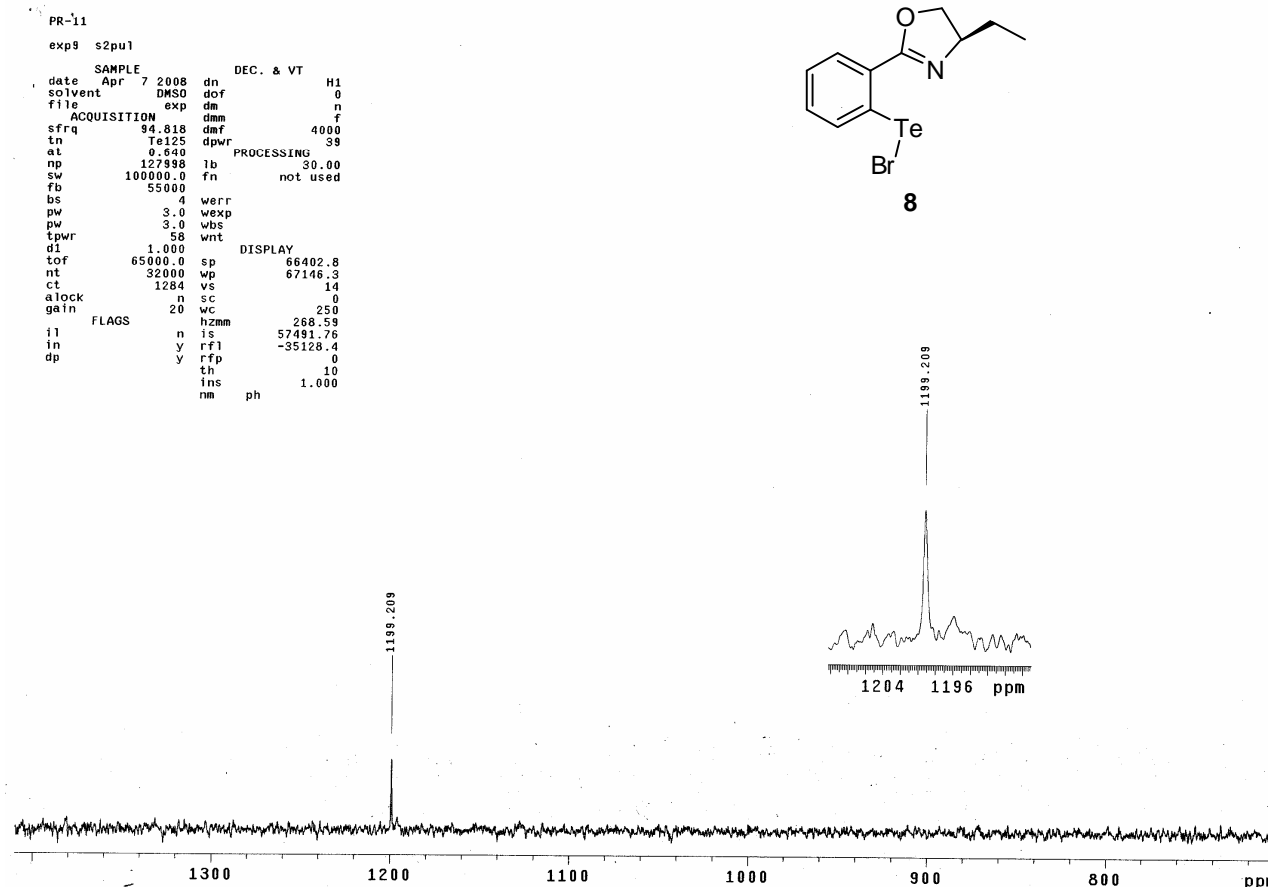

Figure S21.  $^{125}\text{Te}$  NMR spectrum of compound 8.

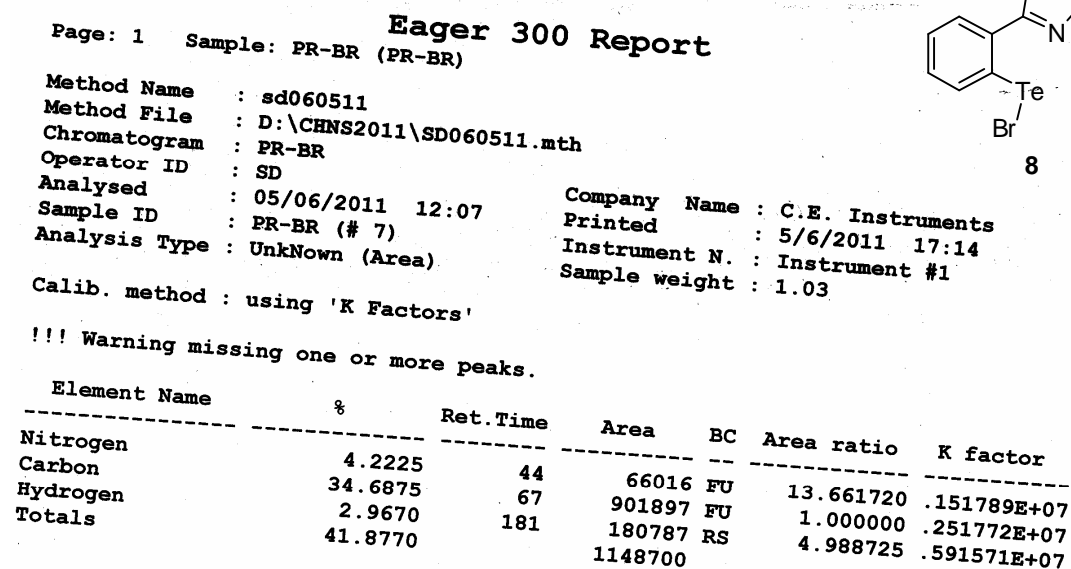

Figure S22. CHN analysis of compound 8.

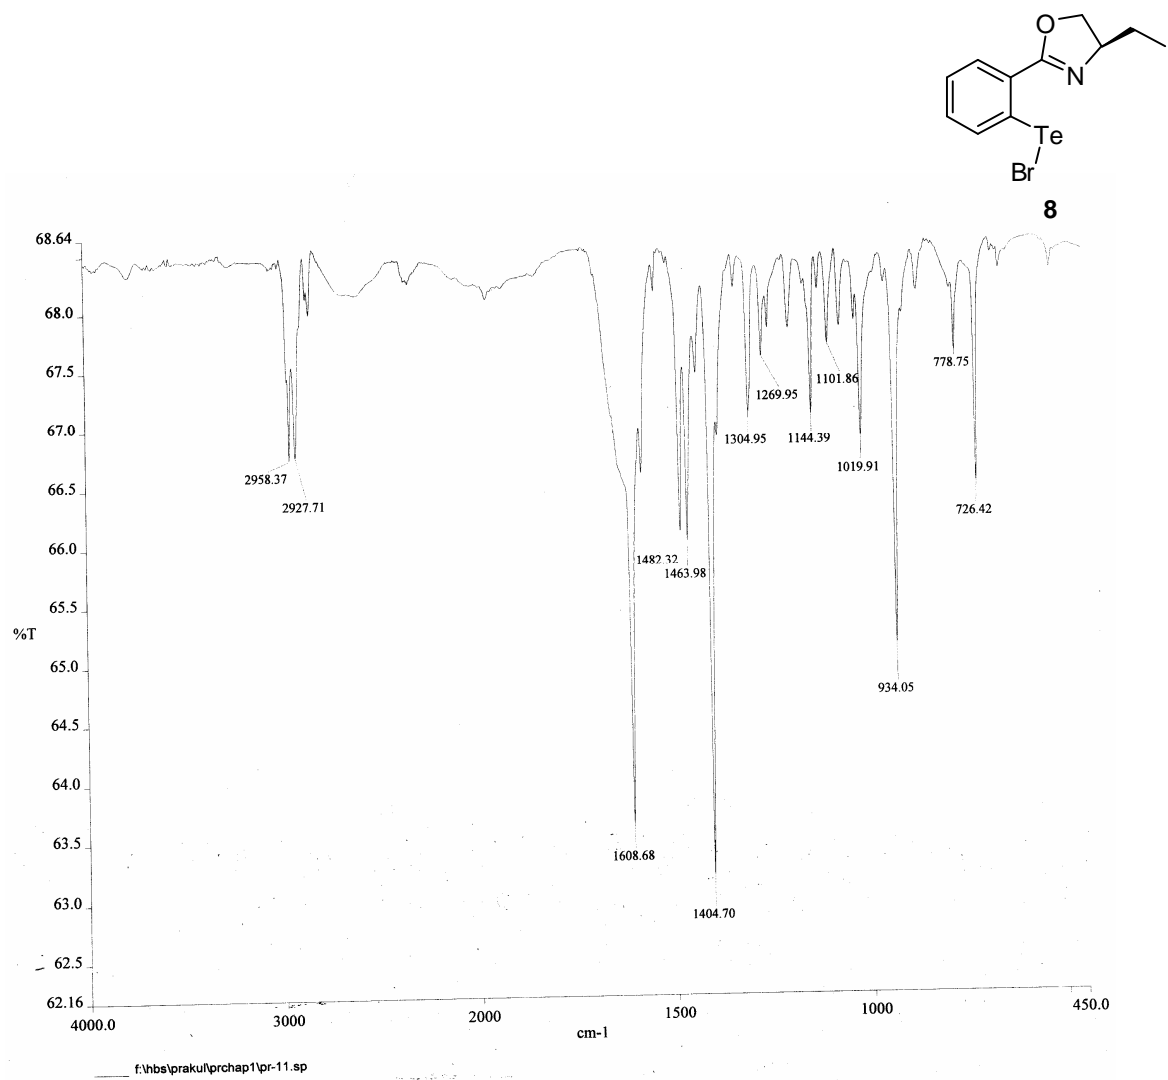

**Figure S23.** FT-IR spectrum of compound 8.

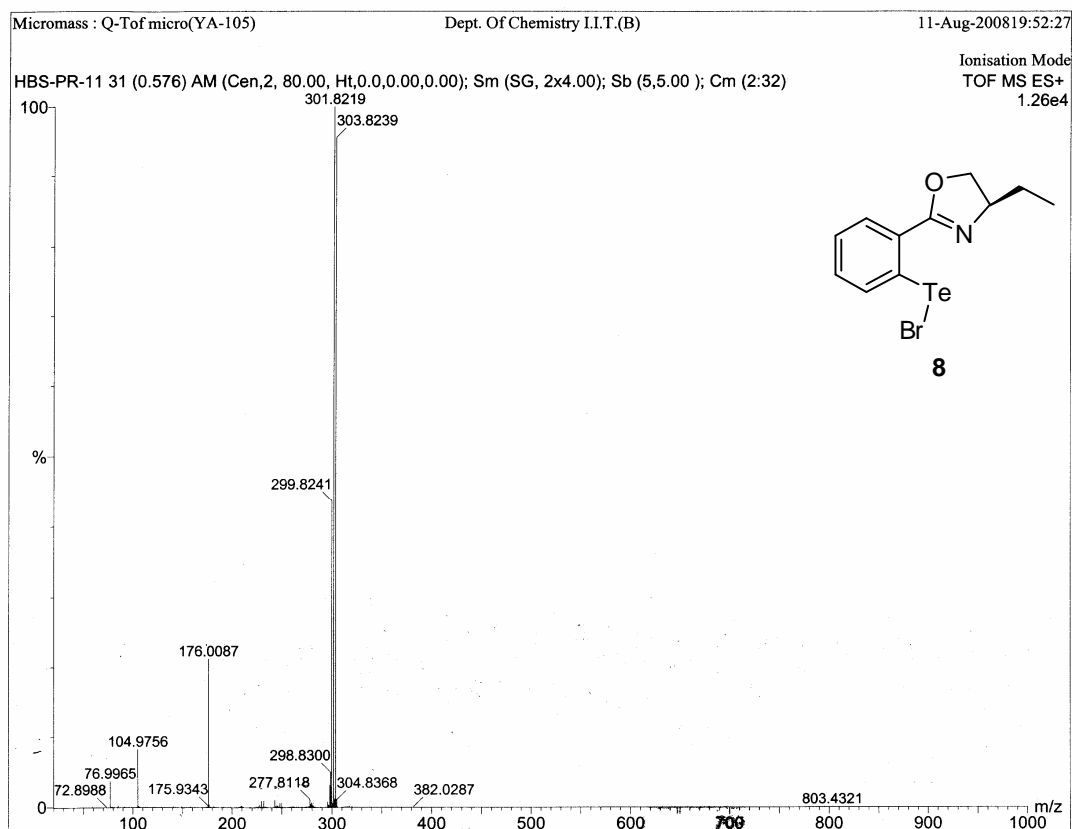

Figure S24. ESI Mass spectrum of compound 8.

### Eager 300 Report

Page: 1 Sample: PR10 (PR10)

Method Name : sp210208  
Method File : G:\eager300\Eager 300 EA1112\sp210208.mth  
Chromatogram : PR10  
Operator ID : SP  
Analysed : 02/21/2008 12:31  
Sample ID : PR10 (# 9)  
Analysis Type : UnkNown (Area)

Company Name : C.E. Instruments  
Printed : 2/21/2008 14:59  
Instrument N. : Instrument #1  
Sample weight : 1.884

Calib. method : using 'K Factors'

!!! Warning missing one or more peaks.

| Element Name | %       | Ret.Time | Area    | BC | Area ratio | K factor    |
|--------------|---------|----------|---------|----|------------|-------------|
| Carbon       | 22.4330 | 66       | 1132745 | RS | 1.000000   | .267092E+07 |
| Hydrogen     | 1.7069  | 169      | 264315  | RS | 4.285585   | .652759E+07 |
| Totals       | 24.1399 |          | 1397060 |    |            |             |

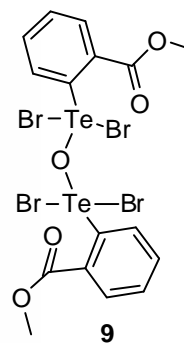

Figure S25. CHN analysis of compound 9.

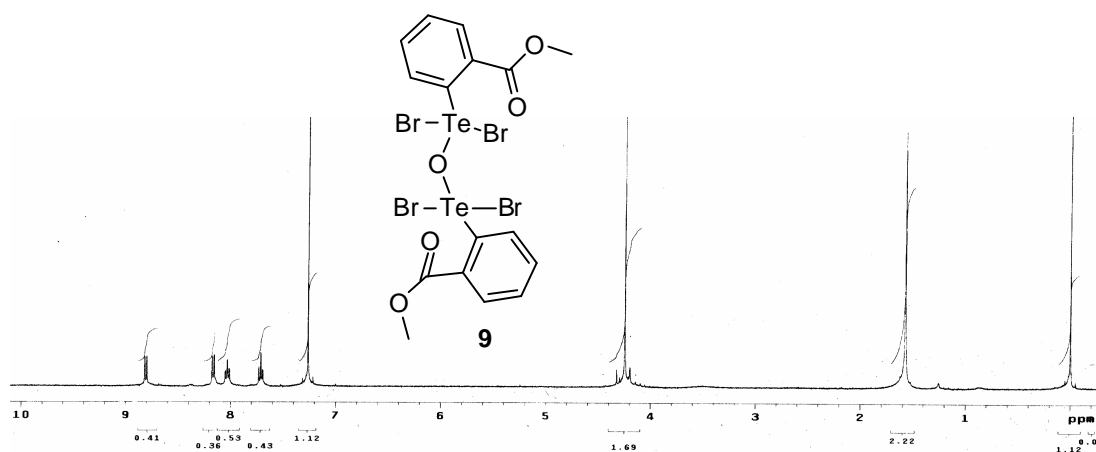

**Figure S26.**  $^1\text{H}$  NMR spectrum of compound **9**.

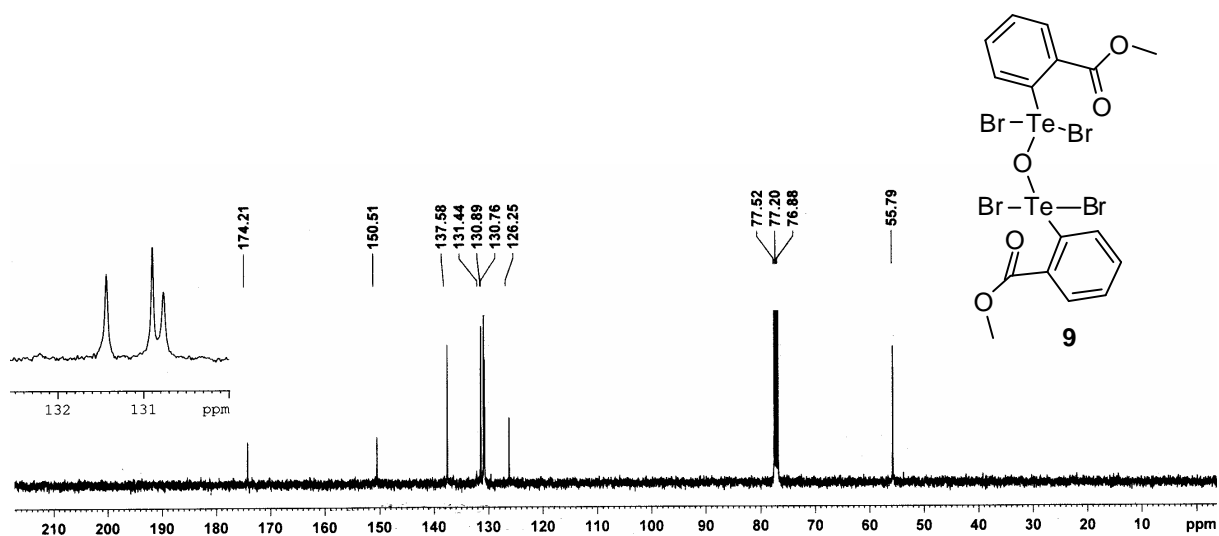

**Figure S27.**  $^{13}\text{C}$  NMR spectrum of compound **9**.

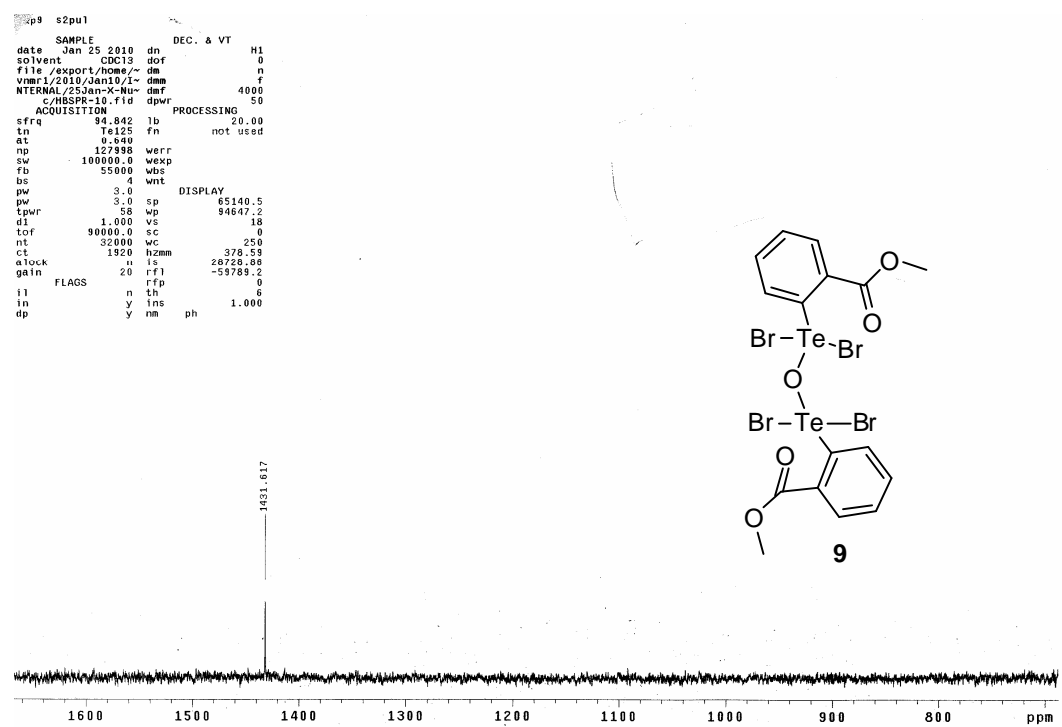

Figure S28.  $^{125}\text{Te}$  NMR spectrum of compound 9.

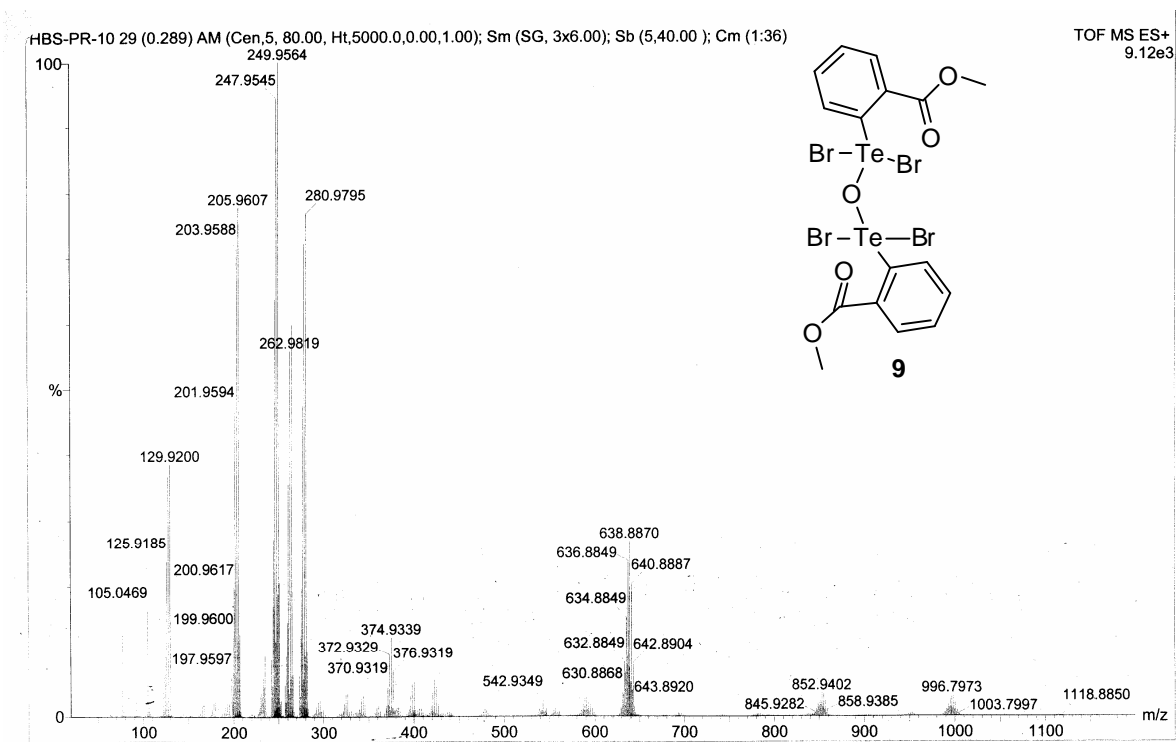

Figure S29. ESI Mass spectrum of compound 9.

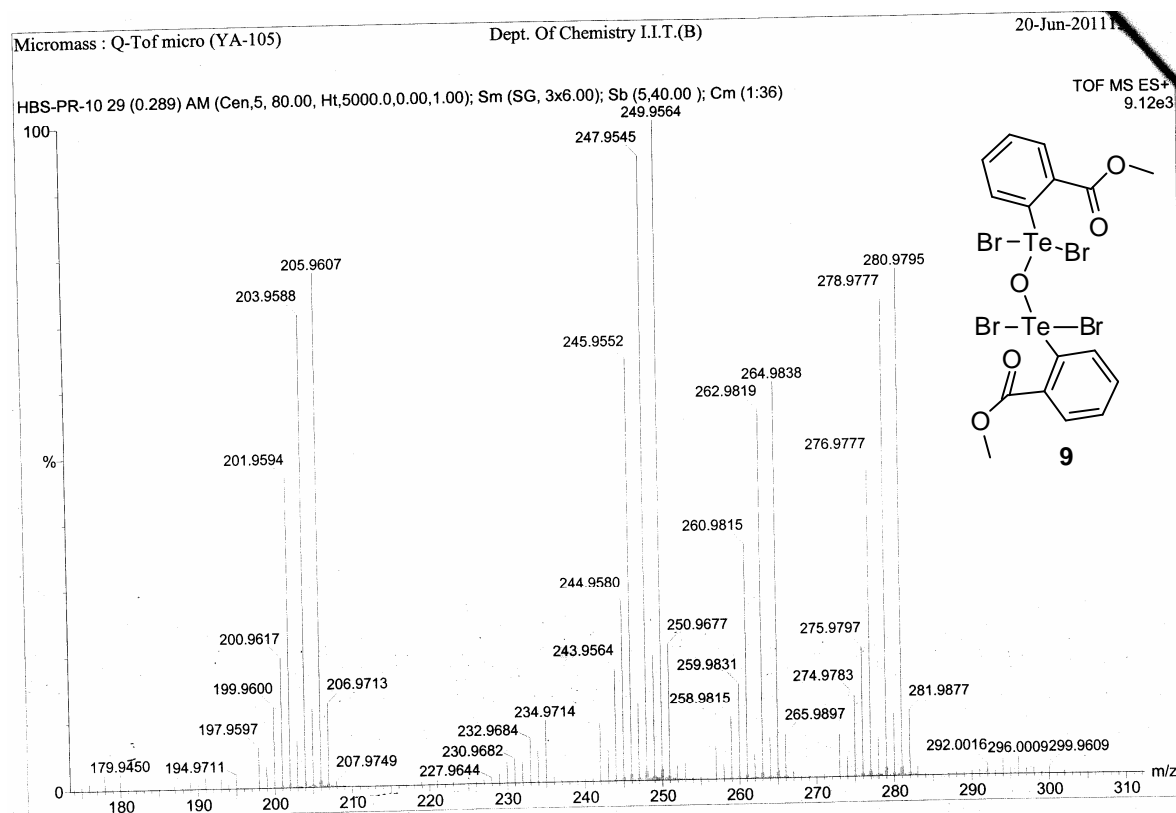

**Figure S30.** Expansion of ESI Mass spectrum of compound **9**.



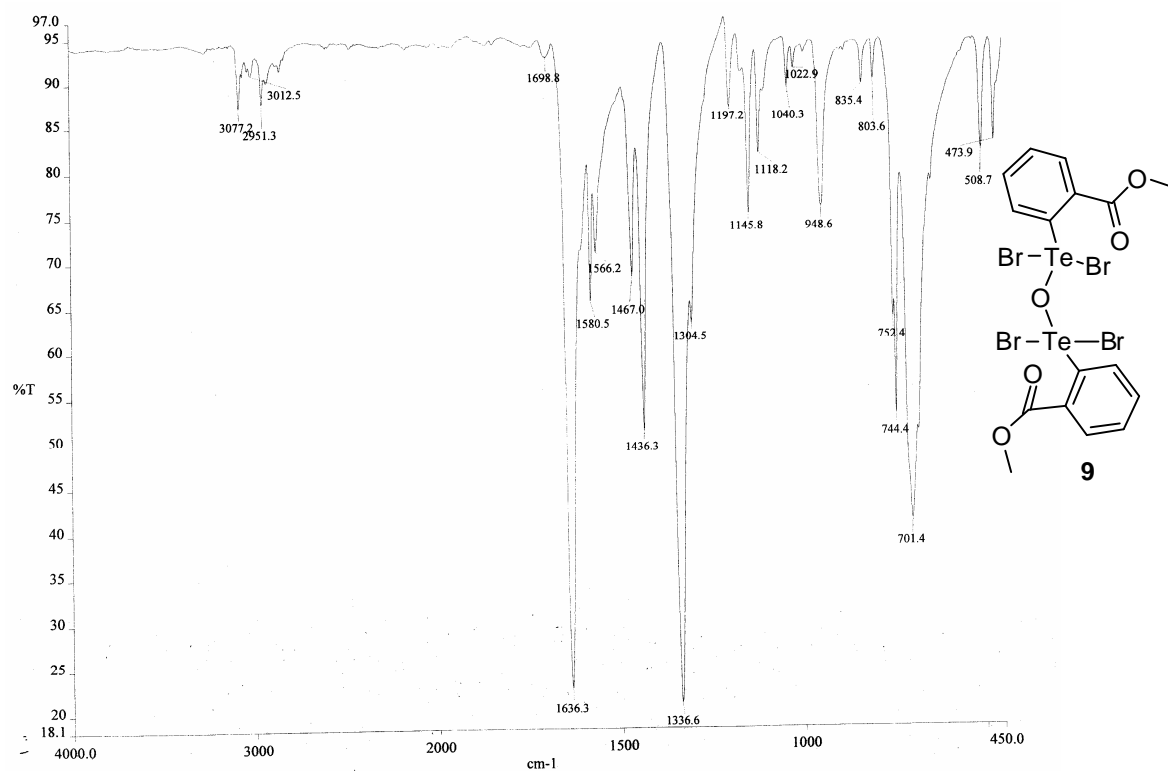

**Figure S31.** FT-IR spectrum of compound **9**.

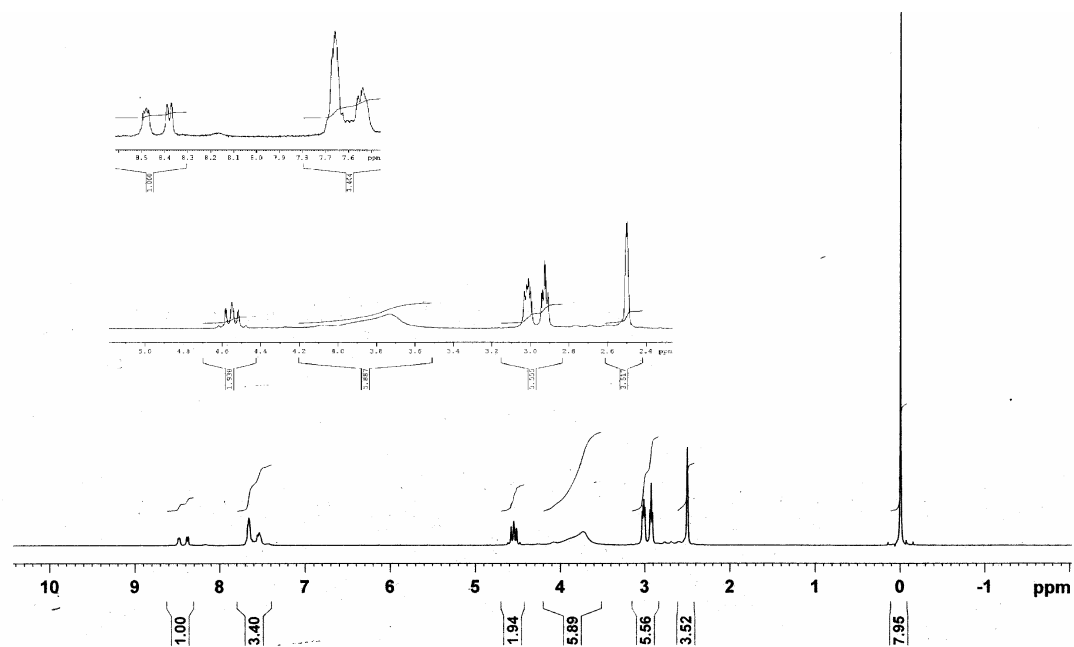

**Figure S32.** <sup>1</sup>H NMR spectrum of compound **12** at 400 MHz (room temperature).

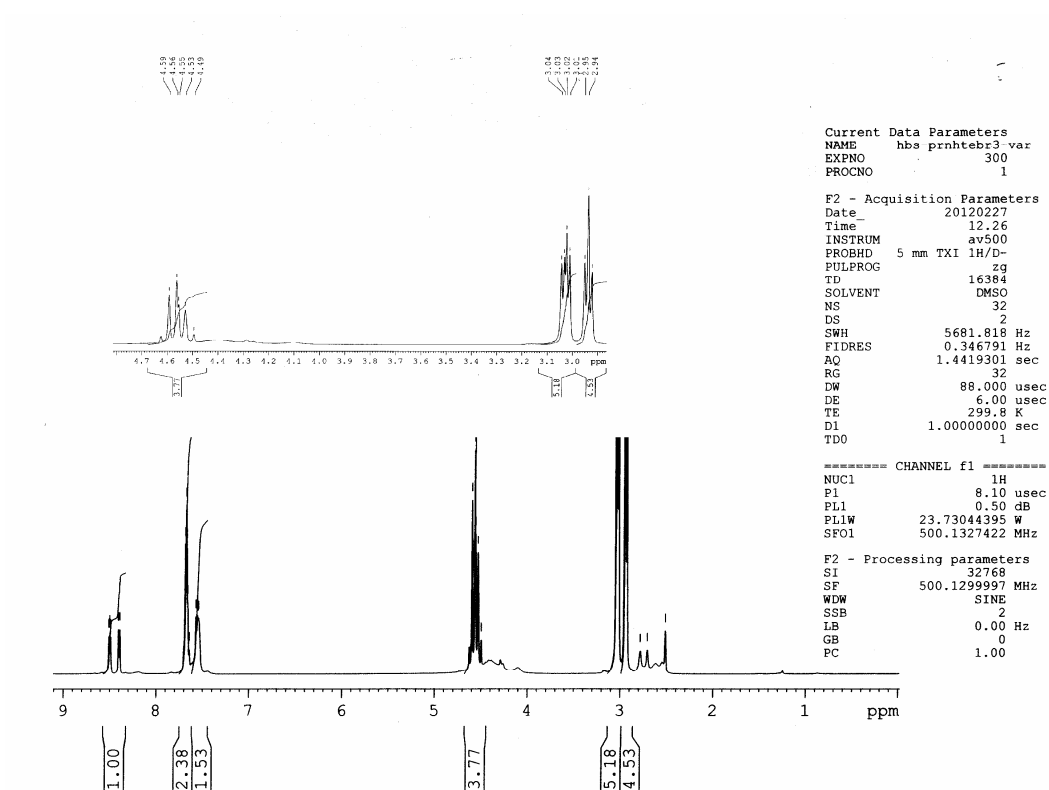

**Figure S33.**  $^1\text{H}$  NMR spectrum of compound **12** at 500 MHz (room temperature).

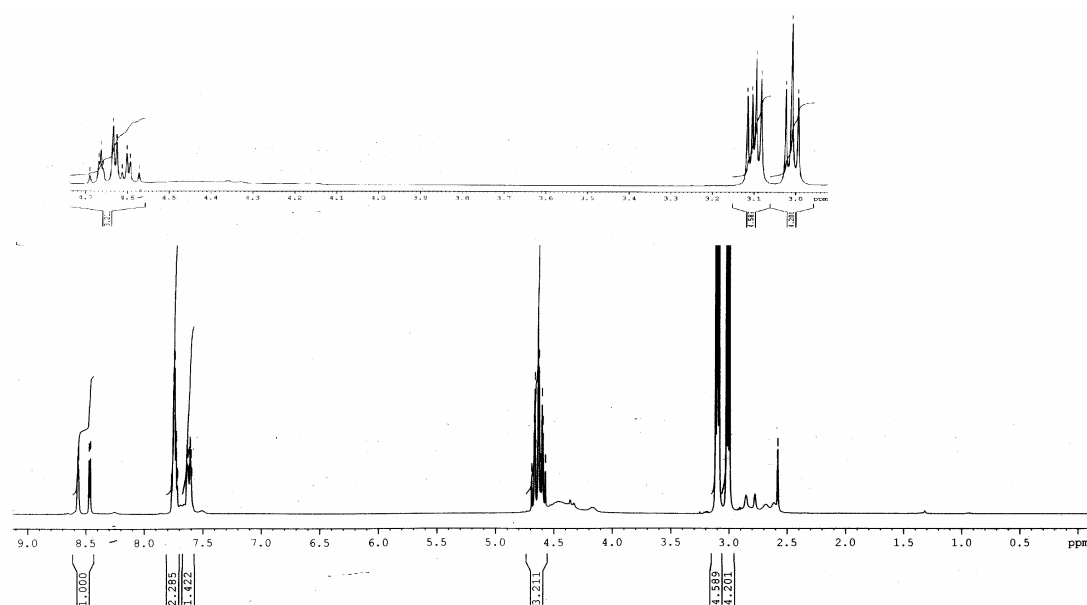

**Figure S34.**  $^1\text{H}$  NMR spectrum of compound **12** at 700 MHz (room temperature).

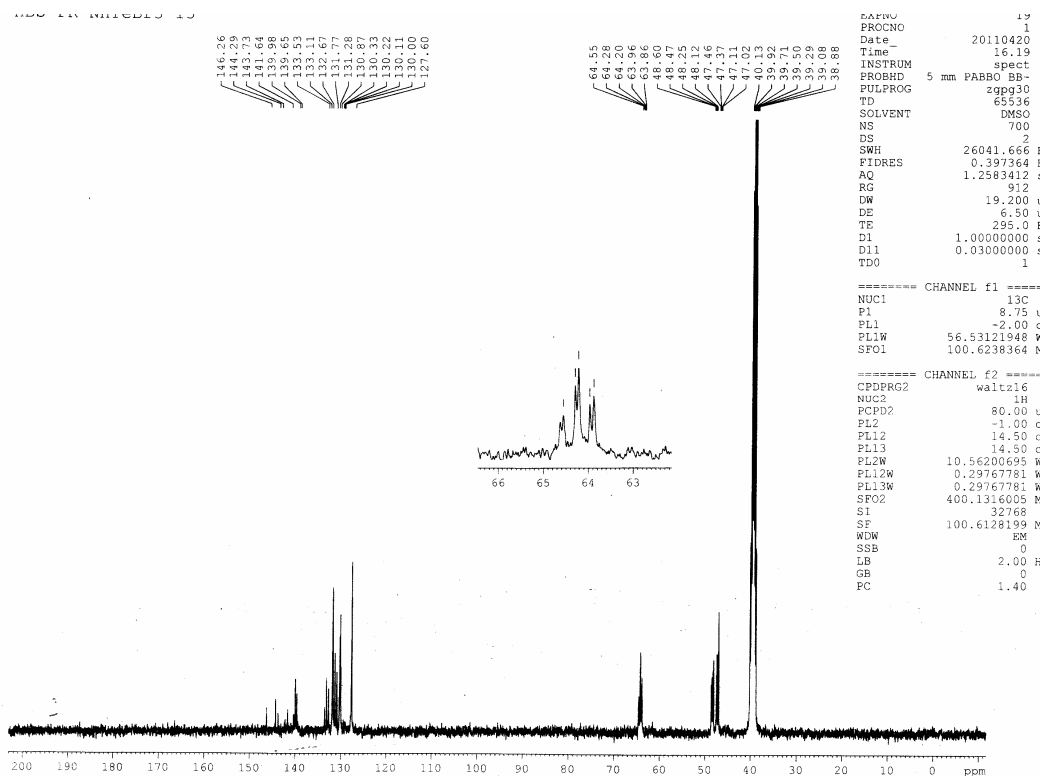

Figure S35.  $^{13}\text{C}$  NMR spectrum of compound **12** at 400 MHz (room temperature)

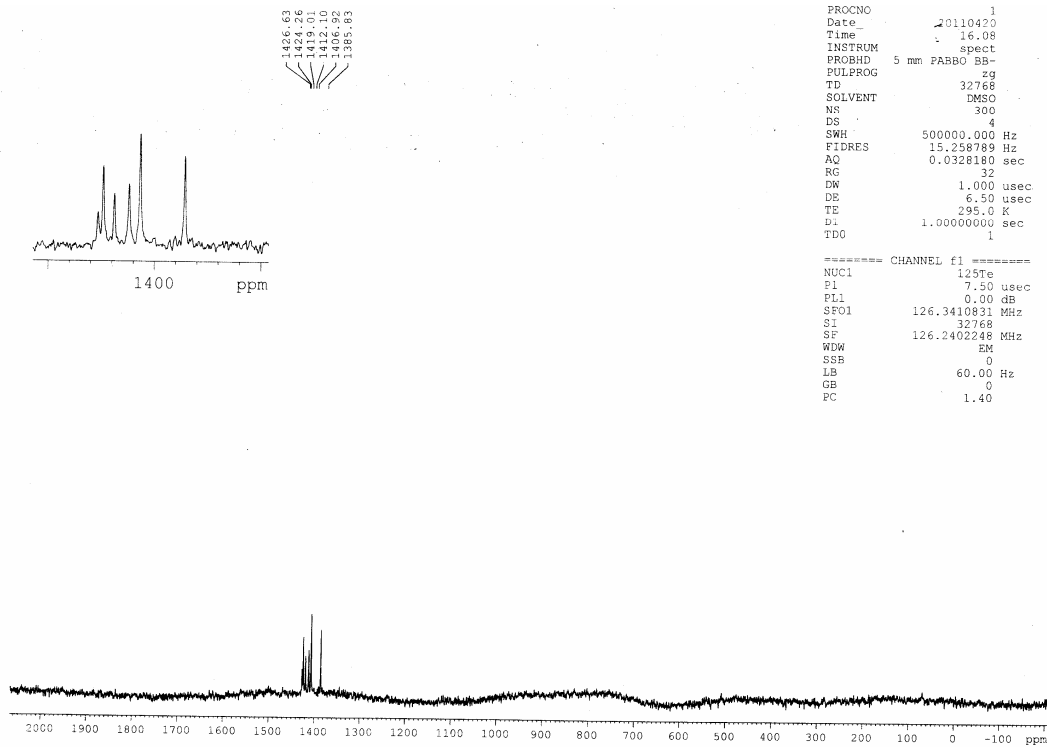

Figure S36.  $^{125}\text{Te}$  NMR spectrum of compound **12** at 400 MHz (room temperature)

## Eager 300 Report

Page: 1 Sample: TE-BRN (TE-BRN)

Method Name : SP260210  
Method File : D:\CHNS2008\SP260210.mth  
Chromatogram : TE-BRN  
Operator ID : SP  
Analysed : 02/26/2010 13:24  
Sample ID : TE-BRN (# 19)  
Analysis Type : UnkNown (Area)  
Company Name : C.E. Instruments  
Printed : 2/26/2010 15:24  
Instrument N. : Instrument #1  
Sample weight : .819

Calib. method : using 'K Factors'

!!! Warning missing one or more peaks.

| Element Name | %       | Ret. Time | Area   | BC | Area ratio | K factor    |
|--------------|---------|-----------|--------|----|------------|-------------|
| 1            | 0.0000  | 18        | 10494  | RS |            | 0.0000      |
| Nitrogen     | 3.4733  | 43        | 32629  | RS | 16.060970  | .114702E+07 |
| Carbon       | 24.0429 | 67        | 524054 | RS | 1.000000   | .264963E+07 |
| Hydrogen     | 2.5778  | 172       | 189699 | RS | 2.762553   | .676466E+07 |
| Totals       | 30.0940 |           | 756875 |    |            |             |

Figure S37. CHN analysis of compound 12

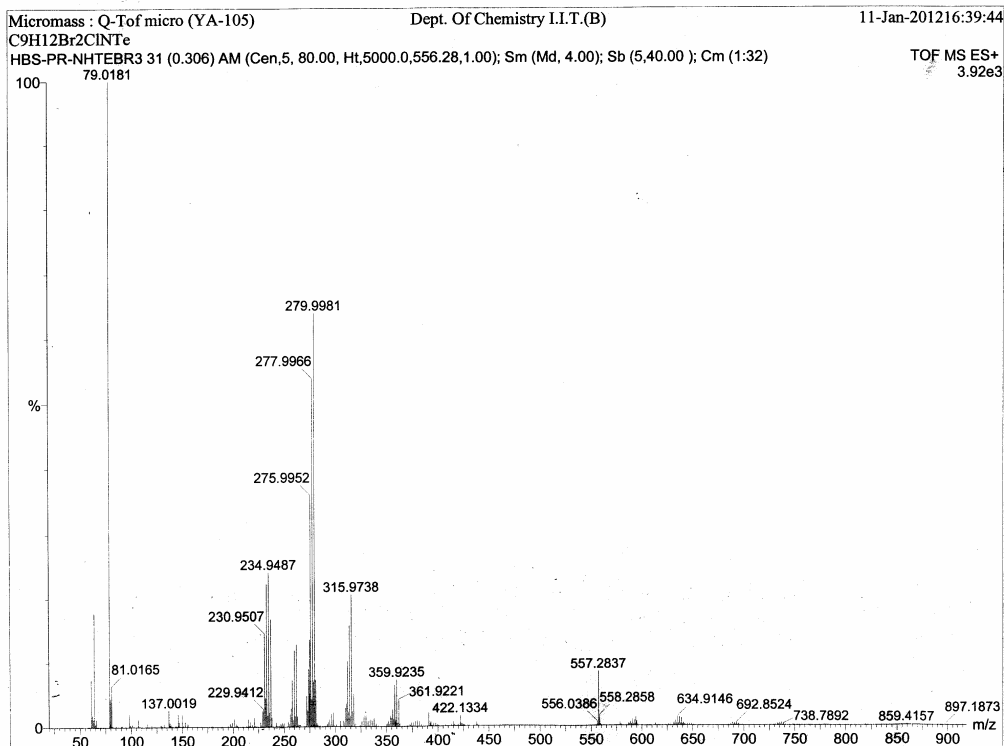

Figure S38. ESI Mass spectrum of compound 12

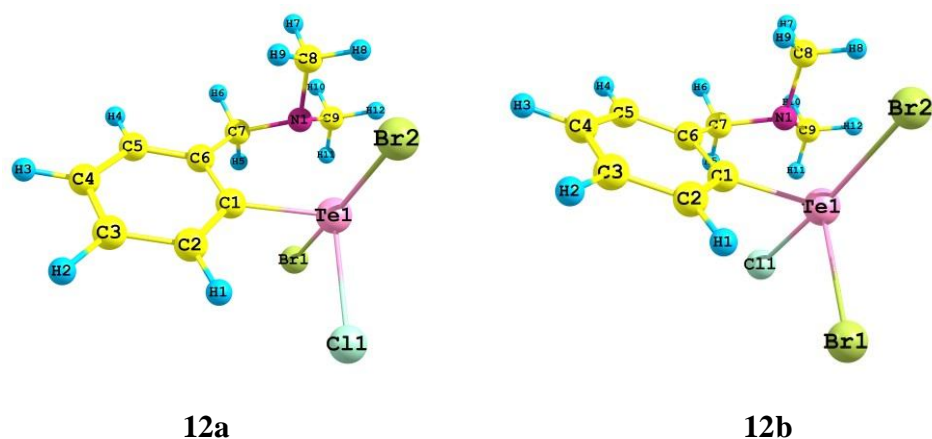

**Figure S39.** Optimized geometries of **12a** and **12b**.

**Table S1.** Comparison of the experimentally obtained structural parameters (Å and °) with those computed at b3pw91/ lan12dz level for 12a and 12b

| Bond lengths<br>(Å) / Bond<br>Angle (°) | <b>12a</b>           |                      | <b>12b</b>            |                      |
|-----------------------------------------|----------------------|----------------------|-----------------------|----------------------|
|                                         | Optimizd<br>geometry | Crystal<br>structure | Optimized<br>geometry | Crystal<br>structure |
| Te1···N1                                | 2.4681               | 2.4315(11)           | 2.4694                | 2.421(5)             |
| Te1-Cl1                                 | 2.5608               | 2.440(1)             | 2.6498                | 2.601(1)             |
| Te1-Br1                                 | 2.8527               | 2.730(2)             | 2.7545                | 2.640(2)             |
| Te1- Br2                                | 2.8259               | 2.647(2)             | 2.8214                | 2.600(2)             |
| Br2-Te-Br1                              | 176.57               | 174.4(3)             | 91.38                 | 89.4(3)              |
| Cl1-Te1-N1                              | 167.43               | 171.6(2)             | 83.24                 | 92.6(2)              |
| N1-Te1-Br2                              | 85.05                | 89.1(13)             | 168.83                | 170.9.1(13)          |

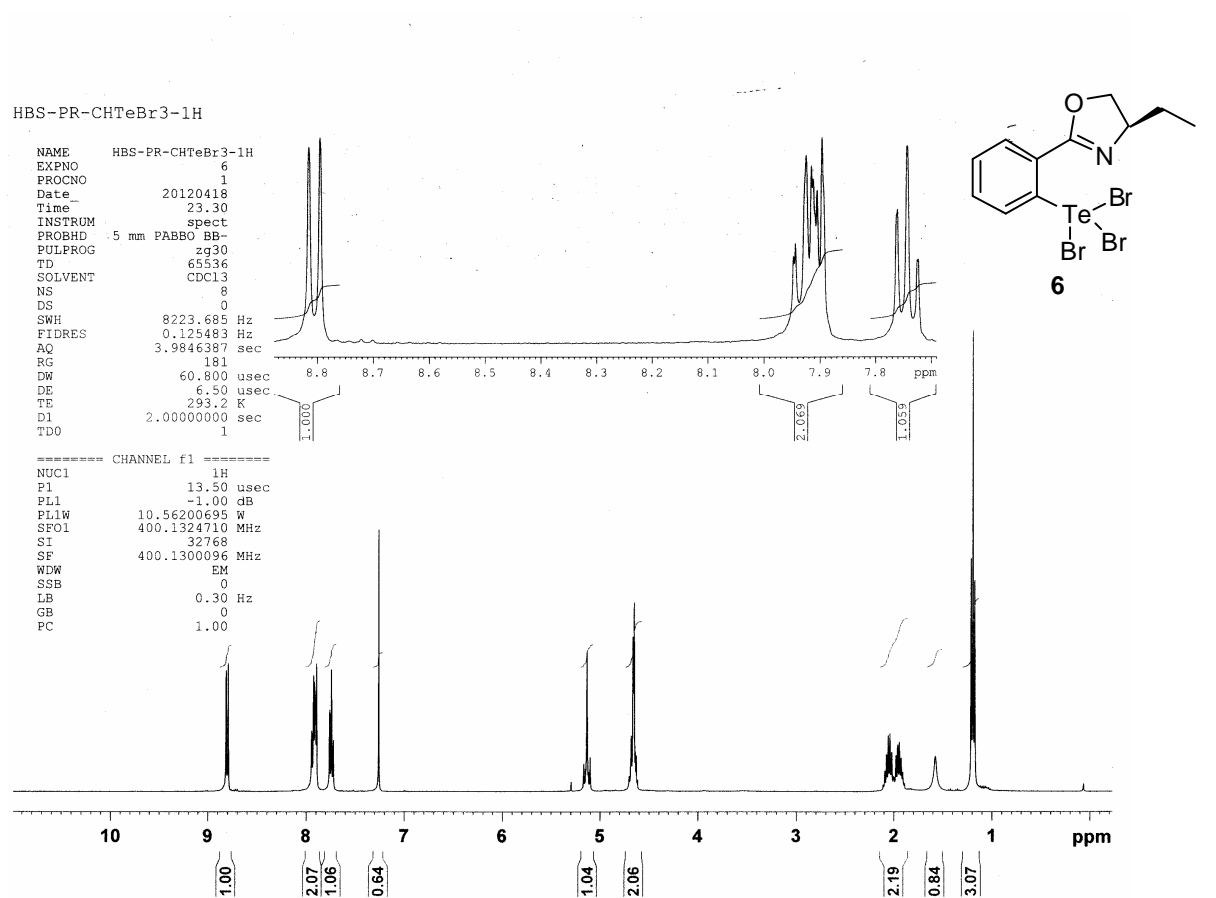

**Figure S40.**  $^1\text{H}$  NMR spectrum of compound **6**.

HBS-PR-CHTeBr<sub>3</sub>+HCl-1H

```

NAME      HBS-PR-CHTeBr3+HCl-1H
EXPNO     7
PROCNO    1
Date_     20120418
Time      23.37
INSTRUM   spect
PROBHD    5 mm PABBO BB-
PULPROG   zg30
TD        65536
SOLVENT   CDCl3
NS         6
DS         0
SWH        8223.665 Hz
FIDRES     0.125483 Hz
AQ         3.984638 / sec
RG         101
DW         60.800 usec
DE         6.50 usec
TE         293.1 K
D1         2.0000000 sec
TD0        1

```

```

===== CHANNEL f1 =====
NUC1       1H
P1         13.50 usec
PL1        -1.00 dB
PL1W       10.56200695 W
SFO1       400.1324710 MHz
SI         32768
SF         400.1300093 MHz
WDW        EM
SSB        0
LB         0.30 Hz
GB         0
PC         1.00

```

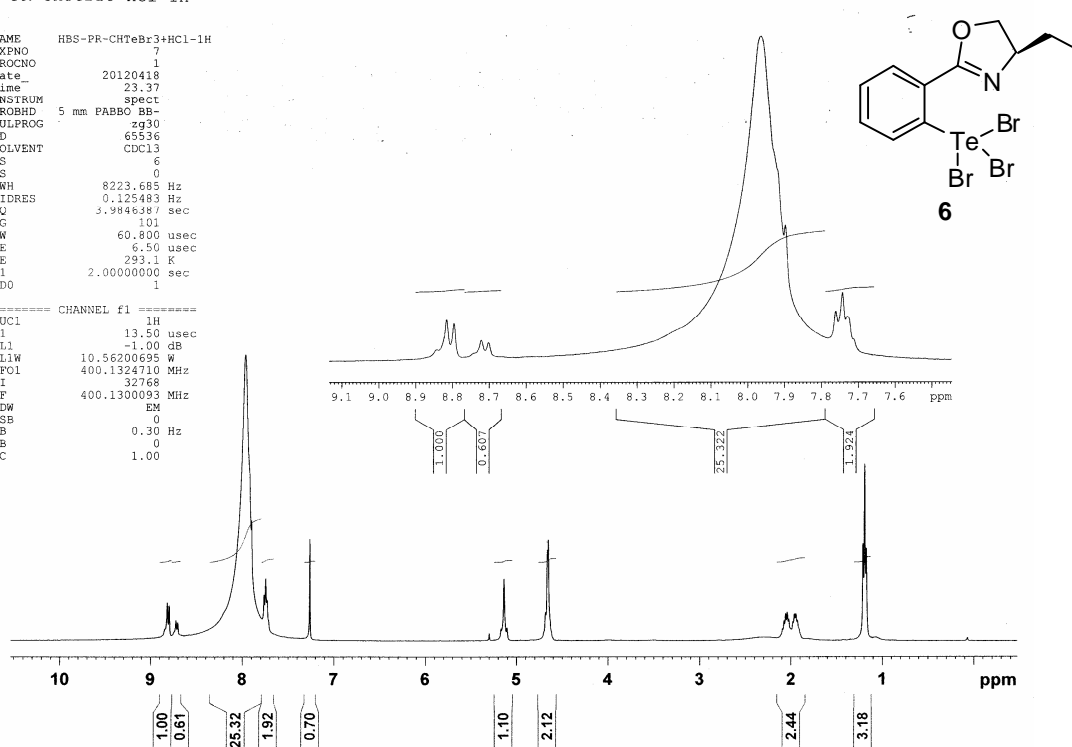

**Figure S41.** <sup>1</sup>H NMR spectrum of compound **6** after the addition of dil. HCl.

HBS-PR-CHTeBr<sub>3</sub>+HCl+D<sub>2</sub>O-1H

```

NAME      HBS-PR-CHTeBr3+HCl+D2O-1H
EXPNO     8
PROCNO    1
Date_     20120418
Time      23.43
INSTRUM   spect
PROBHD    5 mm PABBO BB-
PULPROG   zg30
TD        65536
SOLVENT   CDCl3
NS        37
DS        0
SWH       8223.685 Hz
FIDRES    0.125483 Hz
AQ        3.9846387 sec
RG        101
DW        60.800 usec
DE        6.50 usec
TE        293.0 K
D1        2.00000000 sec
TD0       1
===== CHANNEL f1 =====
NUC1      1H
P1        13.50 usec
PL1       -1.00 dB
PL1W      10.56200695 W
SFO1      400.1324710 MHz
SI        32768
SF        400.1300096 MHz
WDW       EM
SSB       0
LB        0.30 Hz
GB        0
PC        1.00
    
```

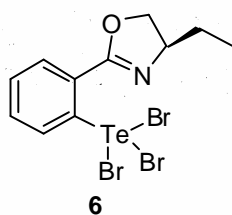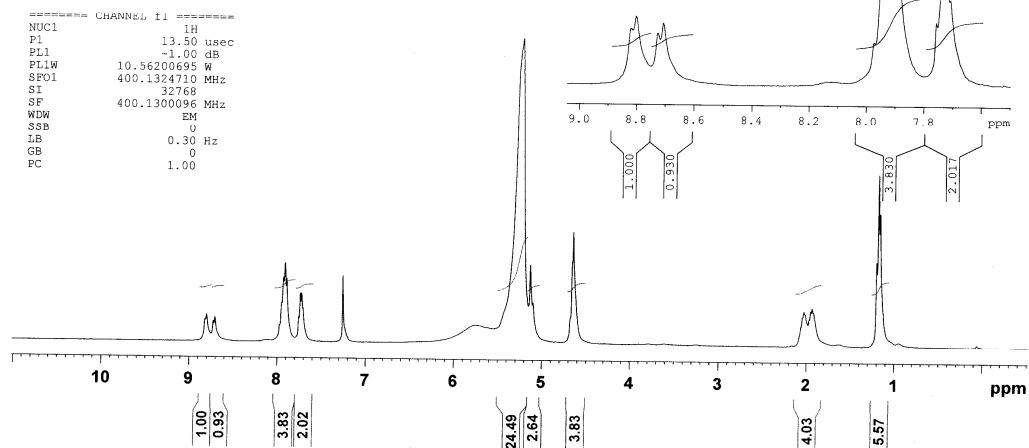

**Figure S42.** <sup>1</sup>H NMR spectrum of compound **6** after the addition of D<sub>2</sub>O.



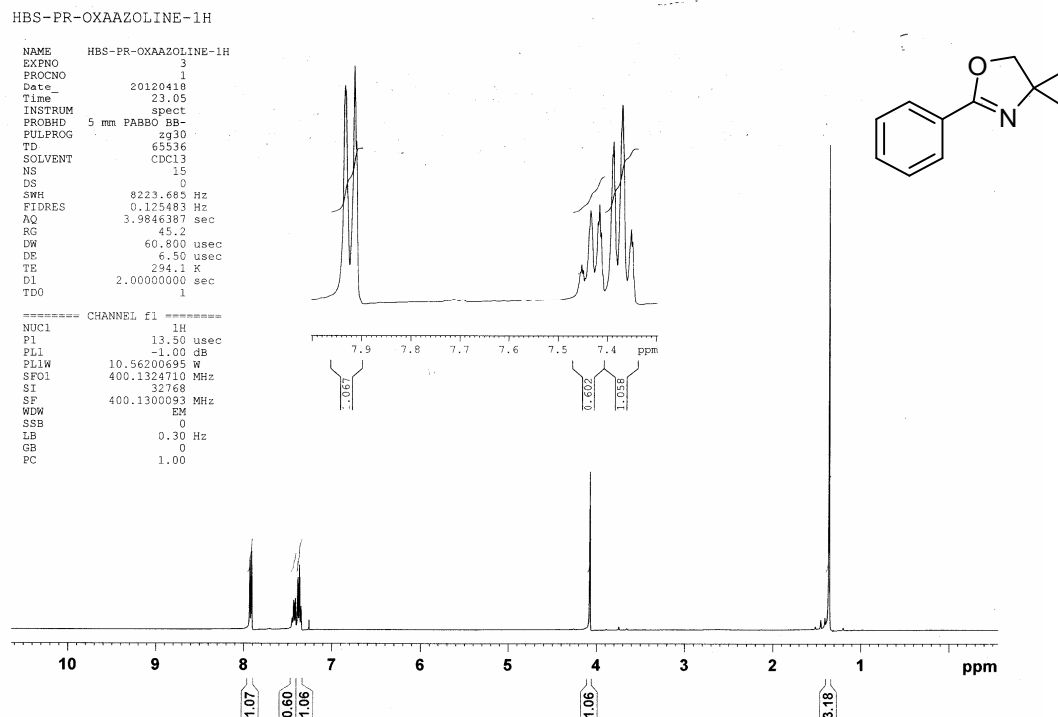

**Figure S43.**  $^1\text{H}$  NMR spectrum of 4,4-dimethyl-2-phenyl-2-oxazoline.

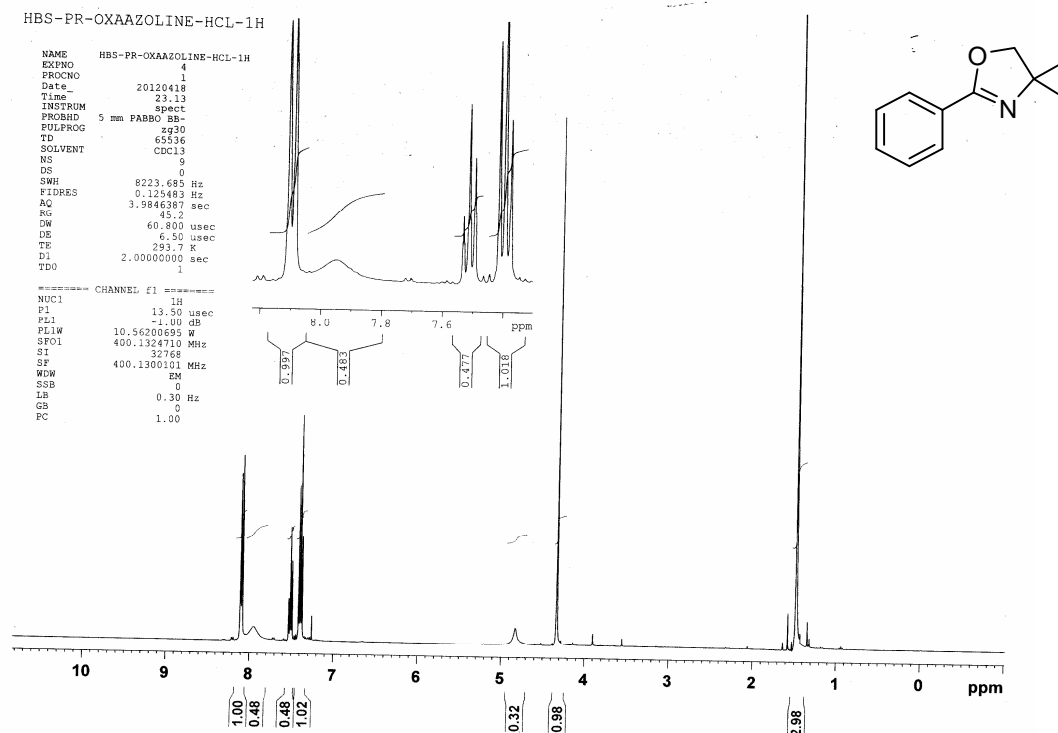

**Figure S44.**  $^1\text{H}$  NMR spectrum of 4,4-dimethyl-2-phenyl-2-oxazoline after the addition of dil. HCl.

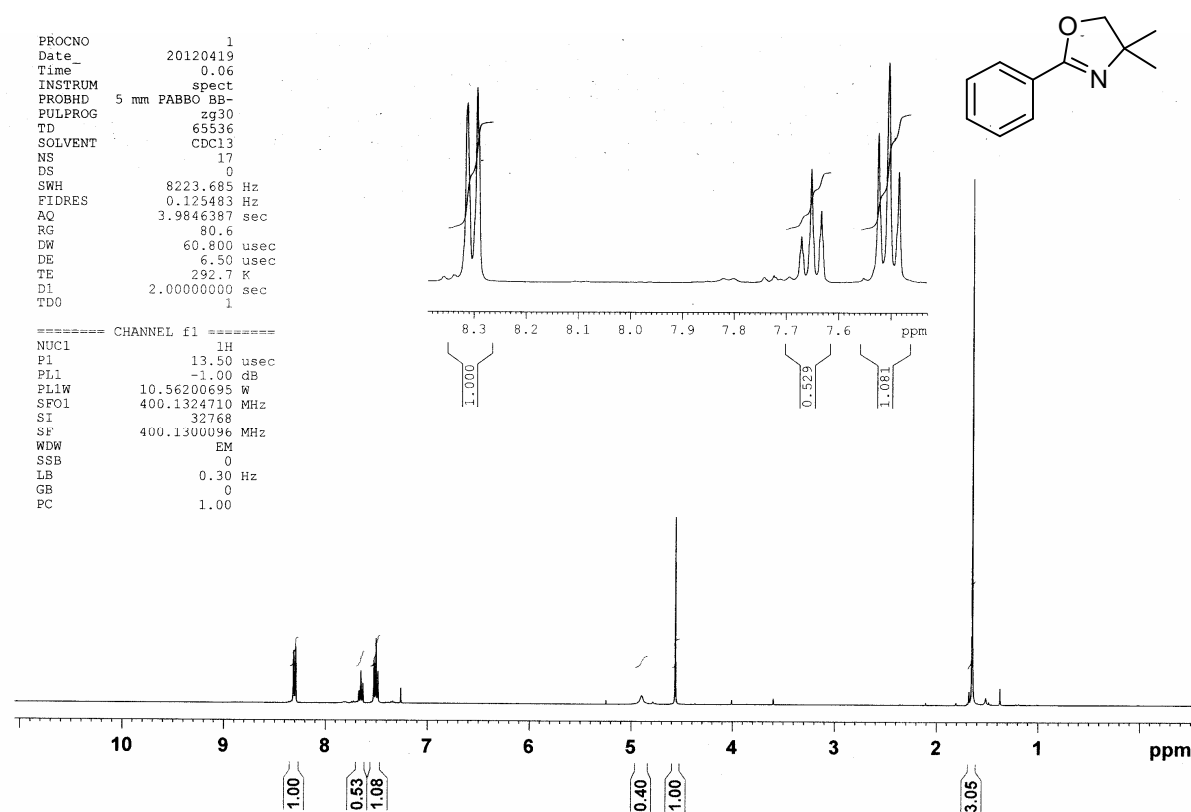

**Figure S45.**  $^1\text{H}$  NMR spectrum of 4,4-dimethyl-2-phenyl-2-oxazoline after the addition of  $\text{D}_2\text{O}$ .
